1 **Structural basis of p62/SQSTM1 helical filaments, their presence in**  
2 **p62 bodies and role in cargo recognition in the cell**

3

4 Arjen J. Jakobi<sup>1,2,3‡</sup>, Stefan T. Huber<sup>1†‡</sup>, Simon A. Mortensen<sup>1,4,5†</sup>, Sebastian W.  
5 Schultz<sup>6</sup>, Anthimi Palara<sup>7</sup>, Tanja Kuhm<sup>1‡</sup>, Birendra Kumar Shrestha<sup>7</sup>, Trond  
6 Lamark<sup>7</sup>, Wim J.H. Hagen<sup>1</sup>, Matthias Wilmanns<sup>2,3</sup>, Terje Johansen<sup>7</sup>, Andreas  
7 Brech<sup>6</sup>, Carsten Sachse<sup>1,4,5\*</sup>

8

9 <sup>1</sup> European Molecular Biology Laboratory (EMBL), Structural and  
10 Computational Biology Unit, Meyerhofstraße 1, 69117 Heidelberg, Germany

11 <sup>2</sup> European Molecular Biology Laboratory (EMBL), Hamburg Unit c/o DESY,  
12 Notkestraße 85, 22607 Hamburg, Germany

13 <sup>3</sup> The Hamburg Centre for Ultrafast Imaging (CUI), Luruper Chaussee 149,  
14 22761 Hamburg, Germany

15 <sup>4</sup> Ernst-Ruska Centre for Microscopy and Spectroscopy with Electrons (ER-C-  
16 3/Structural Biology), Forschungszentrum Jülich, 52425 Jülich, Germany

17 <sup>5</sup> JuStruct: Jülich Center for Structural Biology, Forschungszentrum Jülich,  
18 52425 Jülich, Germany.

19 <sup>6</sup> Department of Molecular Cell Biology, Institute for Cancer Research, Oslo  
20 University Hospital, Montebello, N-0379 Oslo, Norway.

21 <sup>7</sup> Molecular Cancer Research Group, Institute of Medical Biology, University of  
22 Tromsø – The Arctic University of Norway, 9037 Tromsø, Norway

23

24 ‡ Current address: Department of Bionanoscience, Kavli Institute of  
25 Nanoscience, Delft University of Technology, Van der Maasweg 9, 2629 HZ  
26 Delft, Netherlands

27 † These authors contributed equally

28 \* Correspondence should be addressed to: c.sachse@fz-juelich.de

29

30 **Keywords**

31 PB1 domain, p62/SQSTM1, helical filaments, p62 bodies, phase separation,  
32 cargo recognition, autophagy

33 **Abstract**

34 p62/SQSTM1 is an autophagy receptor and signaling adaptor with an N-  
35 terminal PB1 domain that forms the scaffold of phase-separated p62 bodies in  
36 the cell. The molecular determinants that govern PB1 domain filament  
37 formation *in vitro* remain to be determined and the role of p62 filaments inside  
38 the cell is currently unclear. We determined four high-resolution cryo-EM  
39 structures of different human and Arabidopsis PB1 domain assemblies and  
40 observed a filamentous ultrastructure of phase-separated p62/SQSTM1 bodies  
41 using correlative cellular EM. We show that oligomerization or polymerization,  
42 driven by a double arginine finger in the PB1 domain, is a general requirement  
43 for lysosomal targeting of p62. Furthermore, the filamentous assembly state of  
44 p62 is required for autophagosomal processing of the p62-specific cargo  
45 KEAP1. Our results show that using such mechanisms, p62 filaments can be  
46 critical for cargo recognition and are an integral part of phase separated p62  
47 bodies.

## 48 **Introduction**

49 p62/SQSTM1 (from here on p62) is a multifunctional adaptor protein that acts  
50 as a central scaffold protein in different cellular processes such as autophagy  
51 and signaling (Katsuragi, et al. 2015). p62 has a tendency to cluster and in  
52 human cells is often observed in discrete punctae known as p62 bodies  
53 (Lamark et al., 2003). The formation of these bodies is dependent on the amino-  
54 terminal PB1 domain of p62 (Cheng, 2015; Lamark et al., 2003). PB1 domains  
55 are protein interaction modules with critical roles in the assembly of protein  
56 complexes involved in autophagy, signaling, cell division and redox processes  
57 (Moscat et al., 2006), as well as the auxin response pathway in plants (Korasick  
58 et al. 2014). PB1 domains form homotypic interactions via conserved  
59 electrostatic motifs molded by basic or acidic surface patches on opposite faces  
60 of their ubiquitin-like  $\beta$ -grasp fold (Lamark et al., 2003; Wilson et al., 2003).  
61 According to their interaction profile, PB1 domains are classified into type A  
62 (acidic, OPCA motif), type B (basic) or mixed type AB members (Wilson et al.,  
63 2003). While type A and type B PB1 domains can form heterodimeric protein  
64 complexes, type AB members can mediate interactions with either PB1 domain  
65 type or engage in homotypic interactions to form homo-oligomers or hetero-  
66 oligomers (Lamark et al., 2003; Sumimoto et al., 2007). More recently, PB1-  
67 mediated self-interaction of p62/SQSTM1 was found to result in the formation  
68 of filamentous polymers (Paine et al., 2005) with helical symmetry *in vitro*  
69 (Ciuffa et al., 2015).

70

71 p62 has been shown to function in autophagy and cellular signalling. Autophagy  
72 is a degradative cellular housekeeping pathway by which cytoplasmic materials  
73 are engulfed in a double membrane vesicle termed the autophagosome and  
74 delivered to the lysosomal compartment (Mizushima and Komatsu, 2011).  
75 Substrates for autophagy are not limited by molecular size and include large  
76 protein aggregates, intracellular pathogens and cellular organelles. Selective  
77 autophagy has been characterized as the process that specifically directs  
78 cytosolic substrates to the formation site of autophagosomal membranes  
79 (Johansen and Lamark, 2011; Kraft et al., 2010). As an autophagy receptor,

80 p62 links cargo proteins with the autophagosome membrane (Pankiv et al.,  
81 2007). PB1-mediated oligomerization of p62 is essential for its function as a  
82 selective autophagy receptor (Itakura and Mizushima, 2011) and thought to  
83 facilitate co-aggregation of ubiquitylated cargo (Wurzer et al., 2015). The C-  
84 terminal UBA domain of p62 captures ubiquitinated cargo and the LIR motif  
85 guides the cargo-receptor complex to Atg8/LC3, which is anchored to the  
86 surface of the autophagosomal membrane (Bjørkøy et al., 2005; Pankiv et al.,  
87 2007). In signalling, p62 bodies constitute an interaction hub for the kinases  
88 MEKK3, MEK5 and aPKCs, which also contain PB1 domains (Lamark et al.,  
89 2003), in addition to triggering the NFκB pathway through the polyubiquitination  
90 of tumor necrosis factor (TNF) receptor-associated factor 6 (TRAF6) (Duran et  
91 al., 2008).

92

93 Due to p62's involvement in protein homeostasis, the impairment of autophagy  
94 or oxidative stress results in aggregation or upregulation of p62 including  
95 increased body formation (Carroll et al., 2018; Sukserree et al., 2018). Recently,  
96 we and others independently found that p62 reconstituted with other  
97 components of the autophagy pathway, such as ubiquitinated model cargo and  
98 the selective autophagy receptor NBR1, spontaneously coalesces into p62  
99 bodies *in vitro* (Zaffagnini et al., 2018) and shows the characteristics of liquid-  
100 liquid phase separation *in vivo* (Sun et al., 2018). These studies established  
101 that oligomerization by the N-terminal PB1 domain of p62 is an essential  
102 requirement for recapitulating phase separation *in vitro* as well as for cargo  
103 uptake *in vivo* (Sun et al., 2018, Britzen-Laurent et al., 2010; Itakura and  
104 Mizushima, 2011).

105

106 The exact structural requirements and physiological conditions under which  
107 p62-PB1 domains self-assemble or engage in hetero-PB1 complexes are  
108 currently unclear. Furthermore, it is not known what assembly state of p62 is  
109 required for biological functions such as cargo uptake in autophagy or the  
110 formation of phase-separated compartments *in vivo*. Based on high-resolution  
111 electron cryo-microscopy (cryo-EM) and crystal structures, cellular EM,

112 biochemical and cellular characterization, we here reveal the structural basis  
113 for polymeric PB1 self-assembly and define the relevance of symmetry and  
114 spatial arrangement of the polymeric assembly state for p62 autophagy function  
115 *in vivo*.

## 116 **Results**

### 117 **p62, TFG-1 and AtNBR1 PB1 domains form filamentous homo-polymers**

118 Based on our previous finding that p62 is capable of forming homo-oligomeric  
119 filamentous assemblies (Ciuffa et al., 2015), we set out to understand whether  
120 related AB-type PB1 domains possess a similar property to self-assemble. With  
121 reference to sequence alignments, we expressed and purified PB1 domains  
122 from human p62<sup>1-102</sup>, p62<sup>1-122</sup>, TFG-1<sup>1-95</sup> (Trk-fused gene 1), the atypical protein  
123 kinases PKC $\zeta$ <sup>11-101</sup> as well as the evolutionary related PB1 domain of the  
124 NBR1<sup>1-95</sup> autophagy receptor from *Arabidopsis thaliana* (AtNBR1) (Svenning et  
125 al., 2011) (**Figure 1A**). p62, TFG-1, PKC $\zeta$  and AtNBR1 are multi-domain  
126 proteins that share the N-terminal PB1 domain with additional functional C-  
127 terminal domains (**Figure 1B**). In order to assess whether these PB1 domain  
128 containing proteins are capable of forming high-molecular weight assemblies,  
129 we performed sedimentation assays by ultracentrifugation. The PB1 domains  
130 of TFG-1<sup>1-95</sup>, AtNBR1<sup>1-95</sup>, p62<sup>1-102</sup> and p62<sup>1-122</sup> were found in the pellet fraction,  
131 whereas PB1 domains from PKC $\zeta$  remained soluble (**Figure 1C**). We visualized  
132 the pelleted fractions using negative staining electron microscopy (EM) and  
133 observed elongated filamentous or tubular assemblies for the PB1 domains of  
134 p62<sup>1-122</sup>, TFG-1 and AtNBR1 that measure  $145 \pm 5$ ,  $900 \pm 52$  and  $120 \pm 4$  Å in  
135 diameter, respectively (**Figure 1D**). Closer inspection of the sequence  
136 alignments revealed that all three of these PB1 domains share the tandem  
137 arginine motif close to the canonical lysine residue of the basic motif in B-type  
138 PB1 domains. By contrast, this tandem arginine motif is absent in AB-type PB1  
139 sequences of PKC $\zeta$  that does not form filamentous or tubular structures,  
140 suggesting a critical role for self-assembly.

## 141 **Cryo-EM structures of AtNBR1 and p62-PB1 filaments**

142 Of the three PB1 assemblies studied, AtNBR1<sup>1-95</sup> (AtNBR1-PB1) and p62<sup>1-122</sup>  
143 (p62-PB1) formed homogeneous filaments of constant diameter that appeared  
144 best suited for high-resolution structure investigation by cryo-EM. Therefore,  
145 we vitrified filaments of purified AtNBR1-PB1 and p62-PB1 domains and  
146 imaged the samples by cryo-EM (**Figure 2A/B**). Image classification of  
147 segmented PB1 helices revealed that both AtNBR1-PB1 and p62-  
148 PB1 polymerize in two different tubular morphologies: a projection class with a  
149 ladder-like pattern we term L-type and a projection class with a serpent-like one  
150 we term S-type (**Figure 2C and Figure S1A-C**). L-type and S-type helices  
151 partition approximately evenly, i.e. 40% to 60% and 55% to 45% for p62-PB1  
152 and AtNBR1-PB1 samples respectively. Further analysis revealed that the  
153 occurrence of L-type or S-type assemblies is persistent along the individual  
154 helices in micrographs of AtNBR1-PB1 whereas for p62-PB1 filaments  
155 regularly displayed transitions from L-type to S-type symmetry (**Figure S1D**).  
156 In an effort to understand the underlying structures of L-type and S-type  
157 projections, we analyzed the averaged power spectra from in-plane rotated  
158 segments and from class averages. The best Fourier spectra of AtNBR1-PB1  
159 and p62-PB1 showed discrete layer-line reflections up to 5.9 and 4.7 Å  
160 suggesting a helical organization and preservation of structural order up to high  
161 resolution (**Figure S1E-F**). The comparison of the Fourier spectra confirmed  
162 that L-type and S-type structures are differently organized in their helical lattice.  
163 By indexing the layer lines in the Fourier spectra of AtNBR1-PB1 filaments, we  
164 concluded that L-type is a 2-stranded helix with a pitch of 77.2 Å and 11.47  
165 subunits/turn, whereas S-type is a single double-strand helix with a pitch of 68.2  
166 Å and 11.55 subunits/turn. For p62-PB1, we observed a 4-stranded L-type  
167 assembly and a 3-stranded S-type assembly. In the latter S-type, one of the  
168 three helical rungs is propagating in an antiparallel orientation, related to the  
169 central rung by local dihedral symmetry. The L-type here has a pitch of 135.9  
170 Å with 14.16 subunits/turn and S-type has a pitch of 138.6 Å with 14.16  
171 subunits/turn. Using the derived symmetries, we determined the 3.5/3.9 (L-  
172 type, p62/AtNBR1) and 4.0/4.4 Å (S-type, p62/AtNBR1) resolution structures

173 **(Figure 2C and Figure S1G-H)**. All four structures form tubules of  
174 approximately 120 Å and 150 Å width with an inner diameter of 45 Å and 70 Å  
175 for AtNBR1-PB1 and p62-PB1, respectively. In all reconstructions, the main  
176 chain of the PB1 domain could be resolved with  $\alpha$ -helical pitch features and  
177 individual  $\beta$ -strands separated. The overall fold of the asymmetric unit was  
178 found compatible with the NMR structure of the p62 PB1 monomer (Saio et al.,  
179 2009; 2010) **(Figure 3A/B)**. In the absence of prior structural information, we  
180 traced the AtNBR1-PB1 *de novo*. This *de novo*-built model is in close  
181 agreement with the 1.6 Å crystal structure of a polymerization-deficient  
182 AtNBR1-PB1 mutant, which we solved in parallel **(Figure S2A, Table 1)**. The  
183 relative orientation between adjacent subunits is very similar in the respective  
184 S-type and L-type assemblies of AtNBR1-PB1 and p62-PB1 **(Figure S2B)**. The  
185  $\beta$ 1- $\alpha$ 1 loop in p62 is flexible and only visible in the L-type assembly density  
186 **(Figure S2C)**. Expanding the asymmetric unit using the helical parameters of  
187 the L-type and S-type structures allowed analysis of the interface between  
188 repeating units. Despite overall similar interaction modes, the AtNBR1 and p62  
189 assemblies showed differences in relative domain rotation between adjacent  
190 subunits and with respect to the helical axis **(Figure 3C)**. In agreement with  
191 sequence analysis (see **Figure 1A**), the electrostatic potential mapped onto the  
192 molecular surface of the structures revealed that opposing charged surfaces  
193 mediate the PB1-PB1 interactions in the helical repeat **(Figure 3D)**. In addition,  
194 we more closely examined the interface of homomeric interactions in the helical  
195 assemblies. The main interactions are formed between a double arginine finger  
196 formed by two neighboring arginine residues in strand  $\beta$ 2 (R19-R20<sup>AtNBR1</sup>/R20-  
197 21<sup>p62</sup>) stabilizing strong salt-bridges to acidic residues (D60/D62/D64/D73<sup>AtNBR1</sup>  
198 or D69/D71/D73/E82<sup>p62</sup>) in the OPCA motif located in the  $\beta$ 2- $\beta$ 3 loop and the  
199  $\alpha$ 2 helix **(Figure 3E)**. These interactions are assisted by the canonical type B  
200 lysine (K11<sup>AtNBR1</sup> and K7<sup>p62</sup>) in strand  $\beta$ 1. Free energy calculations using the  
201 PDBePISA server (Krissinel and Henrick, 2007) suggest that a large part of the  
202 interface free energy is contributed by the double arginine finger. In addition to  
203 the canonical transverse interactions, the helices are further stabilized by  
204 longitudinal interactions Y14<sup>AtNBR1</sup>/N28<sup>AtNBR1</sup> or K102<sup>p62</sup>/D92<sup>p62</sup> and

205 R59<sup>p62</sup>/D93<sup>p62</sup> to subunits of neighboring strands along the helical axis (**Figure**  
206 **S2D/E**). The importance of electrostatic interactions on filament stability is  
207 further supported by the observation that increased ionic strength impedes  
208 stable filament formation and is sensitive to pH (**Figure S3A-H**). To validate our  
209 structural interpretation, we performed pull-down experiments using MBP-  
210 tagged wild-type AtNBR1-PB1 as a prey and a series of AtNBR1-PB1 interface  
211 mutants as bait (**Figure 3F**). All interface mutants decrease binding significantly  
212 compared with the wild-type and binding is completely abrogated in mutants  
213 lacking the double arginine finger, in agreement with observations in cellular  
214 assays (Svenning et al. 2011; Lamark et al., 2003). Together, the cryo-EM  
215 structures of two PB1 domain assemblies reveal that in addition to the canonical  
216 type electrostatic AB interactions the self-polymerization property is linked to  
217 the presence of a double arginine finger.

#### 218 **p62-PB1 domain interactions in the context of filamentous assemblies**

219 After establishing the molecular basis of PB1 domain homo-polymerization, we  
220 wanted to understand how these assemblies interact with other PB1 domains  
221 of the A and B type that have been shown to co-localize with p62 punctae  
222 (Lamark et al., 2003). We therefore expressed and purified A-type human PB1  
223 domains of MEK5<sup>5-108</sup> and NBR1<sup>1-85</sup>, the B-type PB1 domain of MEKK3<sup>43-127</sup>  
224 and the AB-type PB1 domain of PKC $\zeta$ <sup>11-101</sup> and determined their binding  
225 affinities for polymerization-deficient p62<sup>1-102</sup> (D69A/D73A) (Wilson et al., 2003)  
226 by isothermal titration calorimetry (ITC). These PB1 domains show 2-10 fold  
227 lower binding affinity to p62 compared with its self-interaction dissociation  
228 constant ( $K_D$ ) of 6 nM (Ren et al., 2014), with  $K_D$  of  $8.9 \pm 0.9$  nM,  $12.6 \pm 0.4$  nM,  
229  $26.8 \pm 0.5$  nM, and  $105 \pm 1.3$  nM determined for PKC $\zeta$  (Ren et al., 2014), NBR1,  
230 MEKK3, and MEK5, respectively (**Figure 4A**). We therefore hypothesized that  
231 binding of these PB1 domain could compete with p62 self-polymerization and  
232 affect the assembly structures of p62-PB1 filaments. We found that NBR1-PB1  
233 strongly interacts with p62-PB1 filaments and shortens p62-PB1 filaments on  
234 average to less than half the starting length (**Figure 4B/C**). Surprisingly,  
235 MEKK3, MEK5 and PKC $\zeta$ -PB1 showed no effect on the pelletation behavior of  
236 p62 assemblies although having only marginally lower affinities than NBR1



237 **(Figure 4D)**. To further analyze the interactions, we turned to negative staining  
238 EM. In agreement with the co-sedimentation data, for PB1 domains other than  
239 NBR1 we did not observe any effect on the morphology of p62 PB1 filaments  
240 and the measured filament lengths. In order to increase the sensitivity of  
241 detecting interactions with p62-PB1 filaments, we also imaged p62-PB1  
242 filaments incubated with nanogold-labeled NBR1, MEKK3, MEK5 and PKC $\zeta$   
243 PB1 domains using negative staining EM **(Figure 4E)**. For all PB1 domains,  
244 the micrographs confirmed end-on binding of the PB1 domains to p62-PB1  
245 polymers or to oligomeric, ring-like structures. Interestingly, NBR1, MEK5,  
246 PKC $\zeta$  PB1 domains preferably bind to one end of the filament **(Figure 4F)**  
247 consistent with an overall polar assembly observed in the 3D reconstructions  
248 of p62-PB1 filaments (see **Figure 2**). MEKK3-PB1 (type B) was not observed  
249 at p62-PB1 filament ends, but occasionally found at oligomeric ring-like  
250 structures. Biochemical interaction studies suggest that assembled filamentous  
251 p62 can display significantly lower apparent binding affinities for interacting PB1  
252 domains than when present in the monomeric form.

### 253 **Cellular p62 bodies consist of filamentous structures**

254 Although self-oligomerization of p62 has been shown to be essential for  
255 targeting of p62 to the autophagosome (Itakura and Mizushima, 2011), it is  
256 unclear whether the filamentous assemblies observed *in vitro* are involved in  
257 this process or even occur inside of cells. We used correlative light and electron  
258 microscopy (CLEM) to study the ultrastructure of p62 bodies in a targeted  
259 manner. In order to enrich endogenous p62 bodies in RPE1 cells, we  
260 overexpressed a human NBR1 D50R mutant that abolishes the interaction with  
261 p62 (Lamark et al., 2003). Co-sedimentation experiments in which the relative  
262 amount of p62 in the monomeric and polymeric state are determined indeed  
263 showed that wild-type NBR1 solubilizes filamentous p62-PB1 whereas the  
264 D50R mutant does not **(Figure 5A)**. In RPE1 cells, the NBR1-D50R mutant  
265 consistently produced larger p62 clusters possibly by promoting self-  
266 polymerization as observed *in vitro* **(Figure S4A)**. In such cells, we localized  
267 p62 to punctate areas of  $0.5 \pm 0.1$   $\mu\text{m}$  diameter by fluorescence microscopy  
268 and visualized their ultrastructure by electron tomography **(Figure 5B** and

269 **Figure S4B/C**). The electron micrographs revealed that p62 bodies have a  
270 distinct appearance that is well differentiable from the cytosol with an electron-  
271 dense boundary of approx. 60 nm thickness surrounding the body (**Figure**  
272 **5C/D**). We thresholded the interior density and found the p62 bodies are  
273 composed of a dense meshwork of filamentous assemblies (**Figure 5E**).  
274 Quantitative analysis of thresholded images confirmed the presence of  
275 elongated filament-like structures with an average diameter of 15 nm  
276 compatible in dimensions with the helical p62 structures observed *in vitro*  
277 (Ciuffa et al, 2015). We estimated the length of these structures by tracing  
278 individual filaments in sequential tomogram slices (**Figure 5F**). CLEM  
279 visualization of p62 bodies in cells under endogenous p62 levels confirm the  
280 presence of filamentous assemblies.

### 281 **The effect of different p62's assemblies on autophagy clearance and** 282 **lysosomal targeting of KEAP1**

283 We next set out to assess the relevance of symmetry and assembly state of  
284 PB1-mediated filament assemblies for biological function within cellular p62  
285 bodies and lysosomal targeting through the autophagy pathway. In the  
286 comparison of PB1 assemblies visualized by negative staining EM, TFG1  
287 showed the most striking difference to p62 assemblies both in size and  
288 apparent symmetry (see **Figure 1D**). Therefore, we generated two p62  
289 chimeras by fusing the TFG-PB1 domain to either p62(123-408) or p62 $\Delta$ 123-  
290 319 (mini-p62), containing only the p62 LIR motif and UBA domain) (**Figure**  
291 **6A**) and visualized the resulting assemblies by negative staining EM (**Figure**  
292 **6B**). The TFG-1:p62 chimera forms 48 nm wide filaments, which is  
293 approximately three times the diameter of WT-p62 filaments and possesses a  
294 helical architecture clearly different from that of WT-p62 filaments. The TFG1-  
295 mini-p62 chimera forms defined, ring-shaped oligomers with ~12 nm in  
296 diameter. To test whether the TFG1-p62 fusion constructs are able to form p62  
297 bodies in cells, we expressed the chimeras fused to an N-terminal GFP tag in  
298 HeLa cells deficient of endogenous p62. As controls we also expressed GFP-  
299 tagged WT p62 and the mini-p62 construct (p62 $\Delta$ 123-319) (**Figure 6C**). The  
300 transfected cells were analyzed by confocal fluorescence microscopy 24 h and

301 48 h post transfection. All constructs formed p62 bodies with the majority of  
302 dots having a diameter in the range 0.1 to 0.5  $\mu\text{m}$ . We further classified GFP-  
303 positive punctae according to frequency of occurrence, the tendency to cluster  
304 and the morphological appearance (**Figure 6C-D and Figure S5F**).

305

306 We next asked whether TFG1-p62 could perform the biological function of p62.  
307 We first assessed whether TFG1-p62 can be turned over by autophagy and  
308 targeted to acidified cellular compartments by using the “traffic light” reporter.  
309 Here, the mCherry-YFP tandem tag is fused to the target protein and the  
310 acidification of the construct in lysosomes is monitored by appearance of red  
311 punctae. Although both TFG1-p62 chimera displayed a diffuse yellow fraction,  
312 they were almost as efficiently degraded by autophagy as the WT and mini-p62  
313 constructs (**Figure 6E-F, Figure S5A-D**). We then asked if the TFG-p62  
314 chimera were able to act as cargo receptor for a p62-specific substrate, KEAP1,  
315 and mediate autophagy degradation (Jain et al., 2010). Interestingly, only the  
316 WT and mini-p62 constructs could mediate acidification of tandem tagged  
317 KEAP1 when co-expressed as Myc-tagged constructs in the p62 KO HeLa  
318 cells. No autophagic turnover of mCherry-YFP-KEAP1, however, was observed  
319 upon co-expression with chimera Myc-TFG-p62 or Myc-TFG-minip62 (**Fig. 6G-**  
320 **H, Figure S6A-D**). Autophagy clearance studies established that TFG PB1-p62  
321 chimera can be degraded by autophagy despite their assembly into non-native  
322 polymers, whereas these assemblies are not compatible with the structural  
323 requirements for mediating degradation of the p62-specific substrate KEAP1.

## 324 ***Discussion***

325 The PB1 domain is a common interaction module present in all kingdoms of life  
326 and found in various proteins involved in membrane trafficking, redox  
327 regulation, cell division as well as in signaling. In the current study, we focused  
328 on the structure in addition to the biological and functional relevance of the p62-  
329 PB1 domain in the context of polymeric assemblies. The overall ubiquitin-like  
330 fold of the PB1 domain has been determined and different interface types  
331 through acidic and basic patches have been identified in earlier studies (Lamark  
332 et al., 2003; Wilson et al., 2003). Our cryo-EM structures of filamentous p62

333 and AtNBR1 PB1 assemblies revealed that the presence of a tandem arginine  
334 sequence in the basic motif of type AB interfaces is required to stabilize a  
335 polymeric assembly. Although the exact composition of the interface between  
336 opposed and electrostatically complementary surfaces is distinctly different for  
337 the two PB1 assemblies, the main functional acidic and basic residues including  
338 the essential double arginine finger are conserved (**Figure 3**). Furthermore, we  
339 observed that the propagation of the helical rung is also distinctly different in  
340 p62 and AtNBR1 assemblies, with small changes in primary structure giving  
341 rise to large differences in quaternary structure. This property has been  
342 characterized in other sequence-related helical systems (Egelman et al., 2015).  
343 Interestingly, we also found that the polymeric PB1 domain structures of human  
344 p62 and AtNBR1 are assembled from a common helical rung into two  
345 morphologically distinct organization types, i.e. in the form of differently  
346 organized helical rungs. We speculate that this observed plasticity of  
347 assembling a common helical rung is a consequence of flexibility in forming the  
348 longitudinal PB1-PB1 interactions in the loop regions. As the constructs used  
349 here for structure determination and cellular assays were limited to PB1  
350 domains of AtNBR1 and p62, the relevance and functional consequences of  
351 these different morphological arrangements within cellular polymeric  
352 assemblies remain open. Full-length p62 was shown to be flexible and at this  
353 stage too disordered to be amenable to 3D reconstructions (Ciuffa et al., 2015).  
354 In line with our previous analysis, the PB1 domain directs the C-terminus either  
355 to the outside or the inside of the helical assembly, depending on the exact  
356 helical arrangement. It is possible to envision that different morphological  
357 arrangements affect the availability of critical interaction motifs outside the PB1  
358 domain, i.e. LIR and KIR motif as well as the UBA domain.

359

360 Previous studies showed that purified full-length p62 can also form helical  
361 filaments (Ciuffa et al., 2015; Paine et al., 2005). The existence of these  
362 assembly structures inside of cells, however, had not been demonstrated.  
363 Therefore, we used the CLEM technique to identify and visualize the  
364 ultrastructural organization of p62 found in large clusters known as p62 bodies.

365 Image analysis confirmed that p62 bodies consist of a meshwork of short  
366 filamentous structures. The principal dimension of the observed structures is  
367 consistent in width and length with previous measurements *in vitro* (Ciuffa et  
368 al., 2015). The structures are compatible with recently observed aggregates of  
369 p62 in brain neurons and neuroepithelial cells (Sukseree et al., 2018). Due to  
370 the limited length and flexibility, p62 filaments pack loosely into a spheroid-  
371 shaped, meshwork-like superstructure. The observed bodies with average  
372 dimensions below micrometers in size aggregate in structures that appear  
373 morphologically separated from the cytosol (**Figure 4**), suggestive of phase  
374 separation as observed previously in reconstitution experiments (Sun et al.,  
375 2018; Zaffagnini et al., 2018). The observed body structures of hundreds of  
376 nanometers are also significantly larger than individual filaments with on  
377 average 30 nm length. When organized in such large superstructures, p62  
378 bodies are more similar in dimension to typical molecular cargo, such as protein  
379 aggregates, viruses and organelles when compared with receptor oligomers or  
380 filament assemblies alone.

381

382 The organization of p62 in filamentous assemblies has direct functional  
383 consequences for the interaction with a series of binding partners in the context  
384 of autophagy as well as signaling. It has been demonstrated that a polymeric  
385 organization of p62 can enhance low affinity interactions to highly avid  
386 interactions (Wurzer et al., 2015). In addition, using p62-interacting PB1  
387 domains from MEK5, PKC $\zeta$  and MEKK3 kinases we show that p62 polymeric  
388 assemblies can be capped on one end or dissociate into smaller, ring-like  
389 structures. The intact p62 filaments occlude the bulk of PB1 interaction sites  
390 that are accessible in its monomeric state (**Figure 6**) (Wilson et al., 2003).  
391 Conversely, we show that end-binding of NBR1 to p62 filaments leads to  
392 disassembly and shortening, which can thereby modulate the length of the  
393 filamentous structure. As NBR1 binding has been shown to promote p62 body  
394 formation *in vitro* (Sun et al., 2018; Zaffagnini et al., 2018) to co-localize with  
395 p62 bodies *in vivo* (Kirkin et al., 2009), we hypothesize that this filament-end  
396 interaction by NBR1 cross-links shorter filaments more effectively into larger

397 structures and thereby also affects the size of p62 bodies in cells. We speculate  
398 that other interactors have similar effects on the size and dynamics of p62  
399 bodies as they may occur in phase separation processes. The size of bodies  
400 will also control the availability of interaction sites. The here presented  
401 structures and interaction studies of PB1-p62 filaments reveal a series of  
402 regulation mechanisms that are critical in the functional context of p62's action  
403 in autophagy and signaling.

404

405 In order to understand how the assembly state, the specific symmetry and  
406 subunit arrangement of this state affect p62's biological function, we tested a  
407 series of chimera variants of p62 for their efficiency with regard to cargo uptake  
408 and autophagic degradation in the cell. The experiments showed that polymeric  
409 as well as oligomeric ring-like scaffolds from related PB1 domains fused to the  
410 C-terminal functional domains of p62 can be taken up by the autophagy  
411 machinery almost as efficiently as WT-p62. Interestingly, this is not the case for  
412 variants of p62 that are monomeric and diffuse in the cytosol (Itakura and  
413 Mizushima, 2011). Our results suggest that structures organized in larger  
414 oligomeric clusters are sufficient to mediate self-disposal of p62 (**Figure 5**),  
415 presumably due to increased avidity of accessible LIR motifs and UBA  
416 domains. The specific uptake of the model cargo KEAP1, however, could only  
417 be accomplished by WT-p62 and mini-p62 retaining the structural context of  
418 native p62 assemblies. Other TFG-PB1-p62 chimera polymers were not  
419 capable of transferring KEAP1 to the lysosome. This finding suggests that the  
420 PB1-scaffolded p62 polymers also provide critical 3D interfaces that are  
421 topologically distinct from the KIR motif and participate in the recognition  
422 process of KEAP1 cargo. In conclusion, larger p62 assemblies including ring-  
423 like structures and filaments are essential for disposal of autophagy cargo. The  
424 precise structural context within the filament assembly is required for specific  
425 cargo recognition of KEAP1, and possibly other p62-specific cargoes.

## 426 **Methods**

### 427 **Protein purification and biophysical characterization**

428 **Protein purification.** AtNBR1 residues 1-95 (NBR1-PB1), p62 residues 1-122  
429 (p62-PB1) and TFG-1 residues 1-95 (TFG1-PB1) were cloned into a pETM44  
430 expression vector containing a N-terminal His<sub>6</sub>-tag, followed by a maltose-  
431 binding protein (MBP) tag and a recognition sequence for 3C protease. Proteins  
432 were expressed in *E. coli* BL21 (DE3) using auto-induction in lactose-containing  
433 media (Studier, 2005). After 18 h, cells were harvested by centrifugation, re-  
434 suspended in lysis buffer (50 mM HEPES pH 8.0, 0.5 M NaCl, 0.05 mM TCEP,  
435 0.1 % (v/v) Triton X-100) and lysed by three cycles of rapid freeze-thawing in  
436 liquid nitrogen. After removal of cell debris by centrifugation, recombinant  
437 proteins were purified by Ni-NTA affinity chromatography, and diafiltrated into  
438 50 mM HEPES pH 7.5, 0.1 M NaCl, 0.05 mM TCEP) followed by proteolytic  
439 cleavage of the His<sub>6</sub>/MBP by incubation with 1:200 mol/mol 3C protease at  
440 ambient temperature. After 1h, the cleavage solution was incubated with Talon  
441 resin (Clontech) for 15 min and the resin subsequently sedimented by  
442 centrifugation. The supernatant contained the respective PB1 domains in high  
443 purity. p62 residues 1-122 (p62-PB1) were cloned into pOPTM and expressed  
444 as an MBP fusion protein in *E. coli* BL21 (DE3) using auto-induction (Studier  
445 2005). NBR1 residues 1-85 (NBR1-PB1), pKCζ residues 11-101 (pKCζ-PB1),  
446 MEK5 residues 5-108 (MEK5-PB1) and MEKK3 residues 43-127 (MEKK3-PB1)  
447 were cloned into the pETM11 containing an N-terminal His<sub>6</sub>-tag followed by a  
448 recognition sequence for TEV protease. Proteins were expressed in *E. coli*  
449 BL21 (DE3) using auto-induction (Studier 2005). For the gold labeling  
450 experiments the His<sub>6</sub>-tag was not removed to allow binding of 5 nm Ni-NTA-  
451 Nanogold® (Nanoprobes). For consistency the His<sub>6</sub>-tag was also kept on the  
452 proteins for the co-pelletation assay.

453 **Thermal unfolding assays.** For thermal denaturation assays protein was  
454 dialyzed into 15 mM HEPES (pH 7.5), 150 mM NaCl for pH screening or 100  
455 mM HEPES (pH 7.5) for ionic strength screening. All additives were dissolved  
456 in 50 mM HEPES (pH 7.5). A volume of 12.5 µl of a solution containing 500 ng  
457 protein was diluted in H<sub>2</sub>O with 5x Sypro Orange (Sigma-Aldrich) and

458 immediately mixed with an equal volume of assay condition. All conditions were  
459 assessed in triplicate. Fluorescence increase was monitored on a MyiQ real-  
460 time PCR instrument (BioRad). Assays were performed over a temperature  
461 range of 15–90 °C using a ramp rate of 1 °C/min in steps of 0.5 °C.  
462 Fluorescence data from triplicate measurements were baseline corrected  
463 individually, and unfolding curves were normalized to maximum fluorescence  
464 to give fractional denaturation curves. The apparent  $T_m$  was determined as the  
465 inflection point of a sigmoidal fit to the normalized fluorescence signal using a  
466 customized routine in R.

467

#### 468 **Quantification of PB1 binding affinities**

469 Isothermal titration calorimetry (ITC) experiments were carried out with a VP-  
470 ITC system (MicroCal). Experiments were performed at 25 °C in 10 mM HEPES  
471 (pH 7.5), 150 mM NaCl. Purified p62<sup>1-122</sup> D69A/D73A was placed in the reaction  
472 cell at a concentration of 5–20 µM with either MEK5 or NBR1 at a concentration  
473 of 25–100 µM in the injection syringe. Injections of 10 µL of syringe solution  
474 were performed at 4-min intervals. Integration of raw thermogram data,  
475 baseline correction and data processing were performed with the NITPIC  
476 (Scheuermann and Brautigam, 2015) and SEDPHAT (Zhao et al., 2015)  
477 software packages. The data were corrected by the heat of injection calculated  
478 from the basal heat remaining after saturation. A one-site binding mode was  
479 used to fit the data using a nonlinear least squares algorithm (Brautigam et al.,  
480 2016). The values reported are the mean of three independent measurements  
481 and errors represent the corresponding standard deviation.

#### 482 **Co-pelleting assay**

483 Co-pelleting assay was performed according to the F-actin binding co-  
484 sedimentation assay from Cytoskeleton Inc. In brief, p62-PB1<sup>1-122</sup>, potential  
485 binding partner, or p62-PB1<sup>1-122</sup> together with potential binding partner were  
486 incubated for 1 h on ice followed by centrifugation at 49,000 g, 4 °C for 30 min  
487 in a TLA-100 rotor. The pellet and supernatant were assayed by SDS-PAGE  
488 and stained with Coomassie.



## 489 **Negative staining EM and filament length measurements**

490 p62-PB1<sup>1-122</sup> was incubated with different binding partners for 1 h on ice  
491 followed by 30 min incubation with 5 nm Ni-NTA-Nanogold® (diluted 1:25).  
492 Excess nanogold was removed through pelletation of filaments by  
493 ultracentrifugation at 49,000 g, 4 °C for 30 min in a TLA-100 rotor, and the pellet  
494 fraction was resuspended in 20 mM HEPES pH 8, 50 mM NaCl. The sample  
495 (3.6 µl) was applied to a glow-discharged carbon-coated EM grid and blotted  
496 according to the side blotting method (Ohi et al., 2004). Grids were imaged  
497 using a Morgagni 268 transmission electron microscope (FEI) operated at 100  
498 kV with a side-mounted 1K CCD camera. Filament length for p62-PB1<sup>1-122</sup> and  
499 p62-PB1<sup>1-122</sup>/HsNBR1<sup>1-85</sup> were measured using Fiji (Schindelin et al., 2012) and  
500 statistical analysis was done using a two-tailed unpaired t-test with Welch's  
501 correction in GraphPad Prism 6.0.

## 502 **Electron cryo-microscopy and image processing**

503 **Microscopy.** For AtNBR1<sup>1-95</sup>, a total of 3.0 µl of 0.4 mg/ml AtNBR1-PB1 was  
504 applied to glow-discharged C-flat grids (CF-1.2/1.3-2C, 400 mesh holey carbon  
505 on copper; Protochips) on a Leica GP2 vitrification robot (Leica, Germany) at  
506 95% humidity and 25 °C. The sample was incubated for 10 s on the grid before  
507 blotting for 2 s from the back side of the grid and immediately flash-frozen in  
508 liquid ethane. Micrographs were acquired at 300 kV using an FEI Titan Krios  
509 (Thermo Fisher Scientific) equipped with a Falcon II direct detector at a  
510 magnification of 59,000, corresponding to a pixel size of 1.386 Å at the  
511 specimen level. Image acquisition was performed with EPU Software (Thermo  
512 Fisher Scientific) and micrographs were collected at an underfocus varying  
513 between 0.5 and 4.5 µm. We collected a total of seven frames accumulating to  
514 a dose of 14 e-/Å<sup>2</sup> over 0.82 sec. In total, 742 micrographs were acquired, of  
515 which we selected 684 for further processing after discarding micrographs that  
516 did not show Thon rings exceeding 6 Å.

517 For p62<sup>1-122</sup>, L-type filaments were enriched by the following procedure: 0.2 mg  
518 p62-PB1 (100 µl) was ammonium sulfate precipitated (25 % v/v) and incubated  
519 o/n at 4 °C. Sample was spun at 17,000 g for 15 min at 4 °C and pellet was  
520 resuspended in 50 mM TRIS (pH 7.5), 100 mM NaCl, 4 mM DTT. This

521 ammonium sulfate precipitation was repeated a second time. In the final step  
522 sample was centrifuged at 49,000 g for 45 min at 4 °C and pellet resuspended  
523 in 25  $\mu$ l. A total of 3.6  $\mu$ l resulting p62-PB1<sup>1-122</sup> solution was applied to glow-  
524 discharged Quantifoil R2/1 Cu 400 mesh grids on a Vitrobot Mark IV (Thermo  
525 Fisher Scientific) at 10°C and 100% humidity. The sample was blotted for 5 s  
526 from both sides and flash-frozen in liquid ethane after a drain time of 1 s.  
527 Micrographs were acquired at 300 kV using a FEI Titan Krios (Thermo Fisher  
528 Scientific) with a K2 Summit detector (Gatan, Inc.), a pixel size of 1.04 Å and  
529 an underfocus ranging from 0.5 to 2.5  $\mu$ m. 40 frames were collected in counting  
530 mode with a dose rate of 4.5 e<sup>-</sup>/Å<sup>2</sup>s and a total dose of 40 e<sup>-</sup>/Å<sup>2</sup>. In total, 2277  
531 micrographs were automatically collected and 856 micrographs without ice  
532 contamination or carbon chosen for further processing.

533 **Image processing.** For the AtNBR1 dataset, movie frames were aligned using  
534 MOTIONCORR (Li et al., 2013). The resulting frame stacks and integrated  
535 images (total frame sums) were used for further processing. The contrast-  
536 transfer function of the micrographs was determined with CTFFIND4 using the  
537 integrated images. Helix coordinates were picked using e2helixboxer.py from  
538 the EMAN2 package (Tang et al., 2007). Initially a subset of 100 images was  
539 selected for preliminary processing in SPRING (Desfosses et al., 2014). Briefly,  
540 overlapping helix segments of 350 x 350 Å dimensions were excised from the  
541 frame-aligned images with a mean step size of 60 Å using the SEGMENT  
542 module in SPRING. In-plane rotated, phase-flipped segments were subjected  
543 to 2D classification by k-means clustering as implemented in SPARX (Hohn et  
544 al., 2007). During a total of five iterations, the segments were classified and  
545 iteratively aligned against a subset of class averages chosen based on the  
546 quality of their power spectra. Class averages revealed two distinct helix types  
547 referred to as S-type and L-type. We determined the helical symmetry for the  
548 L-type helices by indexing of the power spectra obtained from the 2D  
549 classification. Final symmetry parameters were determined with a symmetry  
550 search grid using SEGMENTREFINE3DGRID. For 3D refinement and  
551 reconstruction, the excised segments were convolved with the CTF and no in-  
552 plane rotation was applied prior to reconstruction. Starting from the symmetry

553 parameters obtained for the L-type helix, symmetry parameters of the S-type  
554 helix were refined. The maximum of the mean cross correlation peak between  
555 computed and experimental power spectra was found at a pitch of 70 Å, 11.55  
556 units per turn for the two-start L-type helix and a pitch of 68.2 Å, 11.55 units per  
557 turn for the one-start S-type helix. Using the refined symmetry parameters, we  
558 performed a competitive high-resolution multi-model structure refinement using  
559 all 684 images with a final resolution of 4.5/3.9 Å and 5.0/4.4 Å (FSC 0.5/0.143)  
560 for the two-start (L-type) and one-start (S-type) helix reconstructions (**Table**  
561 **S2**).

562 For the p62<sup>1-122</sup> dataset, movie frames were aligned in RELION3 (Zivanov et al,  
563 2018) using 5x5 patches. The contrast-transfer function of the micrographs was  
564 determined with Gctf (Zhang, 2016). Helix coordinates were automatically  
565 picked in RELION3 and segments extracted with a step of 22.5 Å, binning 2  
566 and an unbinned box size of 256 pixels. 2D classification with 100 classes was  
567 performed and classes were selected that showed secondary structure  
568 features. Two separate subsequent 2D classifications were performed with two  
569 distinct groups of 2D classes belonging to an S-type and L-type pattern. Using  
570 SEGCLASSRECONSTRUCT from the SPRING package (Desfosses et al.,  
571 2014) a series of putative helical symmetry solutions could be obtained. In  
572 addition to running a series of refinements with these symmetry solutions, a C1  
573 reconstruction provided additional hints for symmetry parameters. Imposition of  
574 wrong symmetry parameters led to smeared density features whereas only the  
575 correct symmetries for both filament types led to recognizable high-resolution  
576 side-chain features. Helical symmetry was automatically refined in RELION to  
577 77.3° helical rotation and 4.8 Å rise for the S-type and 26.5° rotation and 9.8 Å  
578 rise for the L-type, respectively (**Table S2**). Focussed refinement was  
579 performed using a mask covering the central 25% of the filament along the  
580 helical axis. This approach improved the resulting resolution for the L-type, but  
581 not for the S-type. Final resolution was estimated at 3.5 Å and 4.0 Å using the  
582 FSC and the 0.143 criterion cutoff (Rosenthal and Henderson, 2003), for the L  
583 and S-type respectively.

584

585 **Post-processing and model building.** For visual display and model building,  
586 the AtNBR1 EM density map of the individual reconstructions were initially  
587 filtered to 3.9 Å and 4.4 Å respectively and sharpened using a B-factor of -200  
588 Å<sup>2</sup>. The AtNBR1-PB1 subunit model was built into the 3.9 Å density map of the  
589 L-type arrangement *de novo* in COOT (Emsley and Cowtan, 2004). Residues  
590 81-85 could not be built *de novo* due to weak density, but were added based  
591 on the high-resolution crystal structure obtained in this study which showed  
592 good agreement with the weak density. For the p62-PB1 (3-102) map, the NMR  
593 structure from *rattus norvegicus* (PDB ID 2kkc) was rigid-body fitted into the  
594 RELION-postprocessed density of the L-type filament and then manually  
595 adjusted to the human sequence in COOT (Emsley and Cowtan, 2004). The  
596 models were expanded using helical symmetry and a nine-subunit segment  
597 was excised to serve as a refinement target taking into account interactions  
598 along the azimuthal propagation and lateral interactions along the helical axis.  
599 Following real-space refinement in PHENIX (Adams et al., 2010), we used  
600 model-based density scaling (Jakobi et al., 2017) to generate locally sharpened  
601 maps and completed the model in COOT followed by further iterations of real-  
602 space refinement. The final monomer atomic model from the L-type  
603 arrangement was rigid-body fitted into the S-type density and refinement of the  
604 model was performed as described above.

### 605 **X-ray crystallography**

606 Crystals of AtNBR1<sup>1-95</sup> carrying a D60A/D62A mutation were grown using  
607 hanging drop vapour diffusion at 292 K by mixing equal volumes of 11 mg ml<sup>-1</sup>  
608 protein and reservoir solution. Within 10 h, crystals appeared as needle clusters  
609 in 0.085 M MES (pH 6.5), 18.2% (w/v) PEG20000. Isolated needles (10×2×4  
610 µm) were obtained by streak seeding with a cat whisker into 0.1 M MES (pH  
611 6.5), 18-20% (w/v) PEG20000 or 0.1 M sodium cacodylate (pH 6.5), 0.2 M  
612 (NH<sub>4</sub>)<sub>2</sub>SO<sub>4</sub>, 30-33% PEG8000. For cryo-protection, crystals were soaked in the  
613 crystallization condition supplemented with 15% (v/v) glycerol. Diffraction data  
614 were collected on the ID23-2 microfocus beamline at the European Synchrotron  
615 Radiation Facility (ESRF) and processed with XDS (Kabsch, 2010) (Kabsch,  
616 1993) and AIMLESS (Evans and Murshudov, 2013). Initial attempts to solve

617 the crystal structure using the cryo-EM atomic model were unsuccessful. The  
618 crystal structure was solved using molecular replacement using the monomer  
619 density from the L-type cryo-EM reconstruction as the search model. Briefly,  
620 the monomer density was obtained by cutting out density extending 4.5 Å  
621 beyond the atomic coordinates. The extracted map segment was centred in a  
622 P1 unit cell extending over three times the maximum map dimension, converted  
623 to structure factors using a in house, customized CCTBX (Grosse-Kunstleve et  
624 al., 2002) routine and used for automated molecular replacement in PHASER  
625 (Mccoy et al., 2007). The top scoring solution had a translation function Z-score  
626 of 16.5. Henderson-Lattmann coefficients were generated from the figure-of-  
627 merit (FOM) obtained from the PHASER solution and employed for phase  
628 extension using the high-resolution X-ray crystallographic data by density  
629 modification in RESOLVE (Terwilliger et al., 2013), yielding excellent electron  
630 density. Using the 1.9 Å data, the model was built using Arp/Warp (Langer et  
631 al., 2008) and completed manually in COOT. Table 1 summarizes data  
632 collection and refinement statistics.

### 633 **Correlative light and electron microscopy**

634 For CLEM, RPE1 cells were transiently transfected with pDestEGFP-  
635 NBR1(D50R) (Kirkin et al., 2009) and grown on photo-etched coverslips  
636 (Electron Microscopy Sciences, Hatfield, USA). Cells were fixed in 4%  
637 formaldehyde, 0.1% glutaraldehyde/0.1 M PHEM (240 mM PIPES, 100 mM  
638 HEPES, 8 mM MgCl<sub>2</sub>, 40 mM EGTA, pH 6.9), for 1h. The coverslips were then  
639 washed in PBS containing 0.005% saponin and stained with the indicated  
640 primary antibodies for 1 hour (rabbit anti-p62 (MBL, PM045), mouse anti-NBR1  
641 (Santa Cruz, #sc-130380)), washed three times in PBS/saponin, stained with  
642 secondary antibodies (from Jackson ImmunoResearch Laboratories) for 1  
643 hour, washed three times in PBS and shortly rinsed in water. The cells were  
644 mounted with Mowiol containing 2 µg/ml Hoechst 33342 (Sigma-Aldrich).  
645 Mounted coverslips were examined with a Zeiss LSM780 confocal microscope  
646 (Carl Zeiss MicroImaging GmbH, Jena, Germany) utilizing a Laser diode 405-  
647 30 CW (405 nm), an Ar-Laser Multiline (458/488/514 nm), a DPSS-561 10 (561  
648 nm), and a HeNe-laser (633 nm). The objective used for confocal microscopy

649 was a Zeiss plan-Apochromat 63x/1.4 Oil DIC III. Cells of interest were  
650 identified by fluorescence microscopy and a Z-stack was acquired. The relative  
651 positioning of the cells on the photo-etched coverslips was determined by  
652 taking a DIC image. The coverslips were removed from the object glass,  
653 washed with 0.1 M PHEM buffer and fixed in 2 % glutaraldehyde/0.1 M PHEM  
654 for 1h. Cells were postfixed in osmium tetroxide, stained with tannic acid,  
655 dehydrated stepwise to 100 % ethanol and flat-embedded in Epon. Serial  
656 sections (~100-200 nm) were cut on an Ultracut UCT ultramicrotome (Leica,  
657 Germany), collected on formvar coated mesh-grids, and poststained with lead  
658 citrate.

### 659 **Electron tomography from cellular sections**

660 Samples were observed using a FEI Talos F200C electron microscope  
661 (Thermo Fisher Scientific, Netherlands). Image series were taken between -60°  
662 and 60° with 2° increment. Single-tilt or double-tilt series (as indicated in the  
663 text above) were recorded with a Ceta 16M camera. Single axis tomograms  
664 were computed using weighted back projection and, when applicable, merged  
665 into a dual-axis tomogram using the IMOD package. Display and animation of  
666 segmentation of tomograms were performed using a scripted workflow in  
667 ImageJ and IMARIS.

### 668 **Autophagy and p62 turnover assays**

669 **Antibodies and reagents.** The following antibodies were used: mouse anti-  
670 Myc antibody (Cell Signaling, Cat.#2276#, 1:8000 for western blots and 1:5000  
671 for confocal imaging); rabbit anti-GFP antibody (Abcam, ab290, 1:5000);  
672 guinea pig anti-p62 antibody (Progen, Cat#Gp62-C#, 1:5000); rabbit anti-Actin  
673 antibody (Sigma, Cat#A2066#, 1:1000); Alexa Fluor® 647-conjugated goat  
674 anti-mouse IgG (A21236, 1:1000); HRP-conjugated goat anti-mouse IgG  
675 (1:5000), goat anti rabbit IgG (1:5000) and goat anti-guinea pig IgG (1:5000).  
676

677 **Generation of HeLa cells KO for p62 by CRISPR/Cas9.** To generate  
678 CRISPR/Cas9 p62 gRNA plasmid, sense and antisense p62 gRNA were  
679 annealed and then inserted into plasmid pX330 (Ref PMID: 23287718). For

680 generation of CRISPR/Cas9 p62 KO cells, approximately 30,000 HeLa cells  
681 were seeded per well into 24 well plates and transfected with plasmid pX330  
682 p62 gRNA using Metafectene Pro (Biontex T040). For clonal selection, cells  
683 were treated with 500 ng/ml of puromycin 24 hours after transfection for 48-72  
684 hours. Later, single cells were sorted into 96 well plate using FACS  
685 (fluorescence-activated cell sorting). These clones were allowed to grow for 7-  
686 10 days before screening for KO using immunoblotting. The following sense 5'-  
687 CACCGTCATCCTTCACGTAGGACA-3' and antisense 5'-  
688 AAAGTGCCTACGTGAAGGATGAC-3' gRNAs were used.

689

690 **Construction of Plasmids.** The gateway entry clone pENTR-p62 has been  
691 described previously (Lamark et al., 2003). pENTR-p62  $\Delta$ 123-319 was made  
692 by deletion of pENTR-p62. TFG-p62 fusion constructs were produced by  
693 InFusion PCR. To subclone the TFG-p62 fusion constructs into an ENTRY  
694 vector, an NcoI site was inserted into the start codon of p62 in pENTR-p62,  
695 creating pENTR-p62<sub>CCATGG</sub>. The start codons in TFG-p62 (AJD152) and TFG-  
696 mini-p62 (AJD157) already have NcoI sites, and there is an additional NcoI site  
697 close to the end of the p62 cDNA sequence in pENTR-p62, TFG-p62 and TFG-  
698 mini-p62. To replace wild type p62 of pENTR-p62<sub>CCATGG</sub>, TFG-p62 from  
699 AJD152 and AJD157 were subcloned as NcoI fragments into pENTR-  
700 p62<sub>CCATGG</sub> cut with NcoI, creating pENTR-TFG-p62 and pENTR-TFG-mini-  
701 p62, respectively. Gateway LR recombination reactions were performed as  
702 described in the Gateway cloning technology instruction manual (Invitrogen).  
703 Gateway expression clones pDest-Myc-p62, pDest-EGFP-p62 and pDest-  
704 mCherry-EGFP-KEAP1 have been described previously (Jain et al., 2010;  
705 Lamark et al., 2003). pDest-Myc-p62  $\Delta$ 123-319, pDest-Myc- TFG-p62 and  
706 pDest-Myc- TFG-mini-p62 were made by Gateway LR reactions using  
707 destination vector pDest-Myc (Lamark et al., 2003; mammalian expression of  
708 N-terminal Myc-tagged proteins). pDest-EGFP-p62  $\Delta$ 123-319, pDest-EGFP-  
709 TFG-p62 and pDest-EGFP-TFG-mini-p62 were made using destination vector  
710 pDest-EGFP-C1 (Lamark et al., 2003; mammalian expression of N-terminal  
711 EGFP-tagged proteins). pDest-mCherry-EYFP-p62, pDest-mCherry-EYFP-

712 p62  $\Delta$ 123-319, pDest-mCherry-EYFP- TFG-p62 and pDest-mCherry-EYFP-  
713 TFG-mini-p62 were made using destination vector pDest-mCherry-EYFP  
714 (Bhujabal et al., 2017; mammalian expression of N-terminal mCherry-EYFP  
715 double tagged proteins).

716

717 **Cell culture and transfections.** HeLa p62 KO cells were cultured in Eagle's  
718 minimum essential medium with 10 % fetal bovine serum (Biochrom AG,  
719 S0615), non-essential amino acids, 2 mM L-glutamine and 1 % streptomycin-  
720 penicillin (Sigma, P4333). For transfection was used the same media but  
721 without 1% streptomycin-penicillin. Cells were fixed in 4 % PFA for 20 min at  
722 room temperature. For immunostaining, cells were permeabilized with cold  
723 methanol for 5 min at room temperature, blocked in 3 % goat serum/PBS and  
724 incubated at room temperature with antibodies. For DNA staining was used  
725 1:4000 dilution in PBS of DAPI (Thermo Scientific; pr.66248). Samples were  
726 mounted using Mowiol 4-88 (Calbiochem 475904). Cells were examined using  
727 a Zeiss LSM780 microscope with a 63 x 1.4 oil-objective or a Leica TCS SP8  
728 confocal microscope, 40 X 1.3 oil-objective.

729

730 **Western blot analyses.** Transfected HeLa p62 KO cells were harvested in 50  
731 mM Tris pH 7.4, 2 % SDS, 1 % glycerol. Cell lysates were cleared by  
732 centrifugation, and supernatants resolved by SDS-PAGE and transferred to  
733 Hybond-ECL nitrocellulose membrane (GE healthcare). The membrane was  
734 blocked with 5 % nonfat dry milk in PBS-T, incubated with primary antibody  
735 overnight and HRP-conjugated secondary antibody for 1 hour at room  
736 temperature. Proteins were detected by immunoblotting with a  
737 chemiluminescence Luminol kit (SC-2048, Santa Cruz Biotechnology) using a  
738 LumiAnalyst Imager (Roche Applied Sciences).

739

#### 740 **Accession numbers**

741 The PDB accession number for the atomic coordinates and structure factors for  
742 the AtNBR1-PB1 X-ray crystal structure reported in this paper is PDB-xxx. The  
743 EMDB accession numbers for the L- and S-type AtNBR1-PB1 cryo-EM maps



744 and models are EMD-xxx/EMD-yyy, and PDB-xxx/PDB-yyy and those for the  
745 L- and S-type p62-PB1 cryo-EM maps and atomic coordinate models are EMD-  
746 xxx/EMD-yyy and PDB-xxx/PDB-yyy, respectively.

#### 747 **Acknowledgements**

748 We thank the European Synchrotron Radiation Facility (ESRF, Grenoble,  
749 France), the EMBL beamlines at PETRA-III (DESY, Hamburg, Germany) and  
750 the beamline scientists at ESRF ID23-2 and EMBL-DESY P14 for excellent  
751 support. The project was financially supported by the Boehringer Ingelheim  
752 Fund's Exploration Grant. AJJ acknowledges financial support by an EMBL  
753 Interdisciplinary Postdoc (EIPOD) fellowship under Marie Curie Actions  
754 (PCOFUND-GA-2008-229597), a Marie Skłodowska-Curie IEF fellowship  
755 (PIEF-GA-2012-331285), the Deutsche Forschungsgemeinschaft (DFG)  
756 through the excellence cluster "The Hamburg Center for Ultrafast Imaging (CUI)  
757 – Structure, Dynamics and Control of Matter at the Atomic Scale" (EXC1074)  
758 and the Joachim Herz Foundation.

#### 759 **Competing interests**

760 The authors declare no financial or non-financial competing interest.

761

#### 762 **References**

763

764 Adams, P.D., Afonine, P.V., Bunkóczi, G., Chen, V.B., Davis, I.W., Echols, N.,  
765 Headd, J.J., Hung, L.-W., Kapral, G.J., Grosse-Kunstleve, R.W., et al. (2010).  
766 PHENIX: a comprehensive Python-based system for macromolecular  
767 structure solution. *Acta Crystallogr D Biol Crystallogr* *66*, 213–221.

768 Bjørkøy, G., Lamark, T., Brech, A., Outzen, H., Perander, M., Øvervatn, A.,  
769 Stenmark, H., and Johansen, T. (2005). p62/SQSTM1 forms protein  
770 aggregates degraded by autophagy and has a protective effect on huntingtin-  
771 induced cell death. *The Journal of Cell Biology* *171*, 603–614.

772 Brautigam, C.A., Zhao, H., Vargas, C., Keller, S., and Schuck, P. (2016).  
773 Integration and global analysis of isothermal titration calorimetry data for  
774 studying macromolecular interactions. *Nature Protocols* *11*, 882–894.

775 Britzen-Laurent, N., Bauer, M., Berton, V., Fischer, N., Syguda, A.,  
776 Reipschläger, S., Naschberger, E., Herrmann, C., and Stürzl, M. (2010).

- 777 Intracellular trafficking of guanylate-binding proteins is regulated by  
778 heterodimerization in a hierarchical manner. *PLoS ONE* *5*, e14246.
- 779 Carroll, B., Otten, E.G., Manni, D., Stefanatos, R., Menzies, F.M., Smith, G.R.,  
780 Jurk, D., Kenneth, N., Wilkinson, S., Passos, J.F., et al. (2018). Oxidation of  
781 SQSTM1/p62 mediates the link between redox state and protein homeostasis.  
782 *Nature Communications* *9*, 256.
- 783 Cheng, Y. (2015). Single-Particle Cryo-EM at Crystallographic Resolution.  
784 *Cell* *161*, 450–457.
- 785 Ciuffa, R., Lamark, T., Tarafder, A.K., Guesdon, A., Rybina, S., Hagen,  
786 W.J.H., Johansen, T., and Sachse, C. (2015). The Selective Autophagy  
787 Receptor p62 Forms a Flexible Filamentous Helical Scaffold. *Cell Reports*.
- 788 Desfosses, A., Ciuffa, R., Gutsche, I., and Sachse, C. (2014). SPRING - An  
789 image processing package for single-particle based helical reconstruction  
790 from electron cryomicrographs. *J Struct Biol* *185*, 15–26.
- 791 Duran, A., Linares, J.F., Galvez, A.S., Wikenheiser, K., Flores, J.M., Diaz-  
792 Meco, M.T., and Moscat, J. (2008). The signaling adaptor p62 is an important  
793 NF-kappaB mediator in tumorigenesis. *Cancer Cell* *13*, 343–354.
- 794 Egelman, E.H., Xu, C., DiMaio, F., Magnotti, E., Modlin, C., Yu, X., Wright, E.,  
795 Baker, D., and Conticello, V.P. (2015). Structural plasticity of helical  
796 nanotubes based on coiled-coil assemblies. *Structure* *23*, 280–289.
- 797 Emsley, P., and Cowtan, K. (2004). Coot: model-building tools for molecular  
798 graphics. *Acta Crystallogr D Biol Crystallogr* *60*, 2126–2132.
- 799 Evans, P.R., and Murshudov, G.N. (2013). How good are my data and what is  
800 the resolution? *Acta Crystallogr D Biol Crystallogr* *69*, 1204–1214.
- 801 Grosse-Kunstleve, R.W., Sauter, N.K., Moriarty, N.W., and Adams, P.D.  
802 (2002). The Computational Crystallography Toolbox: crystallographic  
803 algorithms in a reusable software framework. *J Appl Crystallogr* *35*, 126–136.
- 804 Hohn, M., Tang, G., Goodyear, G., Baldwin, P.R., Huang, Z., Penczek, P.A.,  
805 Yang, C., Glaeser, R.M., Adams, P.D., and Ludtke, S.J. (2007). SPARX, a  
806 new environment for Cryo-EM image processing. *J Struct Biol* *157*, 47–55.
- 807 Itakura, E., and Mizushima, N. (2011). p62 Targeting to the autophagosome  
808 formation site requires self-oligomerization but not LC3 binding. *The Journal*  
809 *of Cell Biology* *192*, 17–27.
- 810 Jain, A., Lamark, T., Sjøttem, E., Larsen, K.B., Awuh, J.A., Øvervatn, A.,  
811 McMahon, M., Hayes, J.D., and Johansen, T. (2010). p62/SQSTM1 is a target  
812 gene for transcription factor NRF2 and creates a positive feedback loop by  
813 inducing antioxidant response element-driven gene transcription. *J Biol Chem*  
814 *285*, 22576–22591.

- 815 Jakobi, A.J., Wilmanns, M., and Sachse, C. (2017). Model-based local density  
816 sharpening of cryo-EM maps. *Elife* 6, e27131.
- 817 Johansen, T., and Lamark, T. (2011). Selective autophagy mediated by  
818 autophagic adapter proteins. *Autophagy* 7, 279–296.
- 819 Kabsch, W. (1993). Automatic processing of rotation diffraction data from  
820 crystals of initially unknown symmetry and cell constants - Kabsch - 2007 -  
821 Journal of Applied Crystallography - Wiley Online Library. *J Appl Crystallogr*  
822 26, 795–800.
- 823 Kabsch, W. (2010). Integration, scaling, space-group assignment and post-  
824 refinement. *Acta Crystallogr D Biol Crystallogr* 66, 133–144.
- 825 Katsuragi Y, Ichimura Y, Komatsu M. (2015) p62/SQSTM1 functions as a  
826 signaling hub and an autophagy adaptor. *FEBS J* 282, 4672–4678
- 827 Kirkin, V., Lamark, T., Sou, Y.-S., Bjørkøy, G., Nunn, J.L., Bruun, J.-A.,  
828 Shvets, E., McEwan, D.G., Clausen, T.H., Wild, P., et al. (2009). A role for  
829 NBR1 in autophagosomal degradation of ubiquitinated substrates. *Mol Cell*  
830 33, 505–516.
- 831 Korasick DA, Westfall CS, Lee SG, Nanao MH, Dumas R, Hagen G, Guilfoyle  
832 TJ, Jez JM, Strader LC. (2014) *Proc Natl Acad Sci U S A* 111, 5427-5432.
- 833 Kraft, C., Peter, M., and Hofmann, K. (2010). Selective autophagy: ubiquitin-  
834 mediated recognition and beyond. *Nat Cell Biol* 12, 836–841.
- 835 Lamark, T., Perander, M., Outzen, H., Kristiansen, K., Øvervatn, A.,  
836 Michaelsen, E., Bjørkøy, G., and Johansen, T. (2003). Interaction codes  
837 within the family of mammalian Phox and Bem1p domain-containing proteins.  
838 *J Biol Chem* 278, 34568–34581.
- 839 Langer, G., Cohen, S.X., Lamzin, V.S., and Perrakis, A. (2008). Automated  
840 macromolecular model building for X-ray crystallography using ARP/wARP  
841 version 7. *Nature Protocols* 3, 1171–1179.
- 842 Li, X., Mooney, P., Zheng, S., Booth, C.R., Braunfeld, M.B., Gubbens, S.,  
843 Agard, D.A., and Cheng, Y. (2013). Electron counting and beam-induced  
844 motion correction enable near-atomic-resolution single-particle cryo-EM. *Nat*  
845 *Meth* 10, 584–590.
- 846 Mccoy, A.J., Grosse-Kunstleve, R.W., Adams, P.D., Winn, M.D., Storoni, L.C.,  
847 and Read, R.J. (2007). Phaser crystallographic software. *J Appl Crystallogr*  
848 40, 658–674.
- 849 Mizushima, N., and Komatsu, M. (2011). Autophagy: renovation of cells and  
850 tissues. *Cell* 147, 728–741.

- 851 Moscat, J., Diaz-Meco, M.T., Albert, A., and Campuzano, S. (2006). Cell  
852 Signaling and Function Organized by PB1 Domain Interactions. *Mol Cell* 23,  
853 631–640.
- 854 Ohi, M., Li, Y., Cheng, Y., and Walz, T. (2004). Negative Staining and Image  
855 Classification – Powerful Tools in Modern Electron Microscopy. *Biol. Proc.*  
856 *Online* 6, 23–34.
- 857 Paine, M.G., Babu, J.R., Seibenhener, M.L., and Wooten, M.W. (2005).  
858 Evidence for p62 aggregate formation: role in cell survival. *FEBS Lett* 579,  
859 5029–5034.
- 860 Pankiv, S., Clausen, T.H., Lamark, T., Brech, A., Bruun, J.A., Outzen, H.,  
861 Overvatn, A., Bjørkøy, G., and Johansen, T. (2007). p62/SQSTM1 Binds  
862 Directly to Atg8/LC3 to Facilitate Degradation of Ubiquitinated Protein  
863 Aggregates by Autophagy. *J Biol Chem* 282, 24131–24145.
- 864 Ren, J., Wang, J., Wang, Z., and Wu, J. (2014). Structural and biochemical  
865 insights into the homotypic PB1-PB1 complex between PKC $\zeta$  and p62. *Sci*  
866 *China Life Sci* 57, 69–80.
- 867 Saio, T., Yokochi, M., and Inagaki, F. (2009). The NMR structure of the p62  
868 PB1 domain, a key protein in autophagy and NF-kappaB signaling pathway. *J*  
869 *Biomol NMR* 45, 335–341.
- 870 Saio, T., Yokochi, M., Kumeta, H., and Inagaki, F. (2010). PCS-based  
871 structure determination of protein-protein complexes. *J Biomol NMR* 46, 271–  
872 280.
- 873 Scheuermann, T.H., and Brautigam, C.A. (2015). High-precision, automated  
874 integration of multiple isothermal titration calorimetric thermograms: new  
875 features of NITPIC. *Methods* 76, 87–98.
- 876 Schindelin, J., Arganda-Carreras, I., Frise, E., Kaynig, V., Longair, M.,  
877 Pietzsch, T., Preibisch, S., Rueden, C., Saalfeld, S., Schmid, B., et al. (2012).  
878 Fiji: an open-source platform for biological-image analysis. *Nat Meth* 9, 676–  
879 682.
- 880 Studier, F.W. (2005). Protein production by auto-induction in high-density  
881 shaking cultures. *Protein Expr Purif* 41, 207–234.
- 882 Sukserree, S., László, L., Gruber, F., Bergmann, S., Narzt, M.S., Nagelreiter,  
883 I.M., Höftberger, R., Molnár, K., Rauter, G., Birngruber, T., et al. (2018).  
884 Filamentous Aggregation of Sequestosome-1/p62 in Brain Neurons and  
885 Neuroepithelial Cells upon Tyr-Cre-Mediated Deletion of the Autophagy Gene  
886 Atg7. *Mol. Neurobiol.* 55, 8425–8437.
- 887 Sumimoto, H., Kamakura, S., and Ito, T. (2007). Structure and Function of the  
888 PB1 Domain, a Protein Interaction Module Conserved in Animals, Fungi,  
889 Amoebas, and Plants. *Science Signaling* 2007, re6.

- 890 Sun, D., Wu, R., Zheng, J., Li, P., and Yu, L. (2018). Polyubiquitin chain-  
891 induced p62 phase separation drives autophagic cargo segregation. *Cell Res.*  
892 *28*, 405–415.
- 893 Svenning, S., Lamark, T., Krause, K., and Johansen, T. (2011). Plant NBR1 is  
894 a selective autophagy substrate and a functional hybrid of the mammalian  
895 autophagic adapters NBR1 and p62/SQSTM1. *Autophagy* *7*, 993–1010.
- 896 Tang, G., Peng, L., Baldwin, P.R., Mann, D.S., Jiang, W., Rees, I., and  
897 Ludtke, S.J. (2007). EMAN2: an extensible image processing suite for  
898 electron microscopy. *J Struct Biol* *157*, 38–46.
- 899 Terwilliger, T.C., Read, R.J., Adams, P.D., Brunger, A.T., Afonine, P.V., and  
900 Hung, L.W. (2013). Model morphing and sequence assignment after  
901 molecular replacement. *Acta Crystallogr D Biol Crystallogr* *69*, 2244–2250.
- 902 Wilson, M.I., Gill, D.J., Perisic, O., Quinn, M.T., and Williams, R.L. (2003).  
903 PB1 domain-mediated heterodimerization in NADPH oxidase and signaling  
904 complexes of atypical protein kinase C with Par6 and p62. *Mol Cell* *12*, 39–50.
- 905 Wurzer, B., Zaffagnini, G., Fracchiolla, D., Turco, E., Abert, C., Romanov, J.,  
906 and Martens, S. (2015). Oligomerization of p62 allows for selection of  
907 ubiquitinated cargo and isolation membrane during selective autophagy. *Elife*  
908 *4*, 1687.
- 909 Zaffagnini, G., Savova, A., Danieli, A., Romanov, J., Tremel, S., Ebner, M.,  
910 Peterbauer, T., Sztacho, M., Trapannone, R., Tarafder, A.K., et al. (2018).  
911 p62 filaments capture and present ubiquitinated cargos for autophagy. *Embo*  
912 *J* *37*.
- 913 Zhang, K. (2016). Gctf: Real-time CTF determination and correction. *J Struct*  
914 *Biol* *193*, 1–12.
- 915 Zhao, H., Piszczek, G., and Schuck, P. (2015). SEDPHAT--a platform for  
916 global ITC analysis and global multi-method analysis of molecular  
917 interactions. *Methods* *76*, 137–148.
- 918

919 **Figure legends**

**Figure 1**

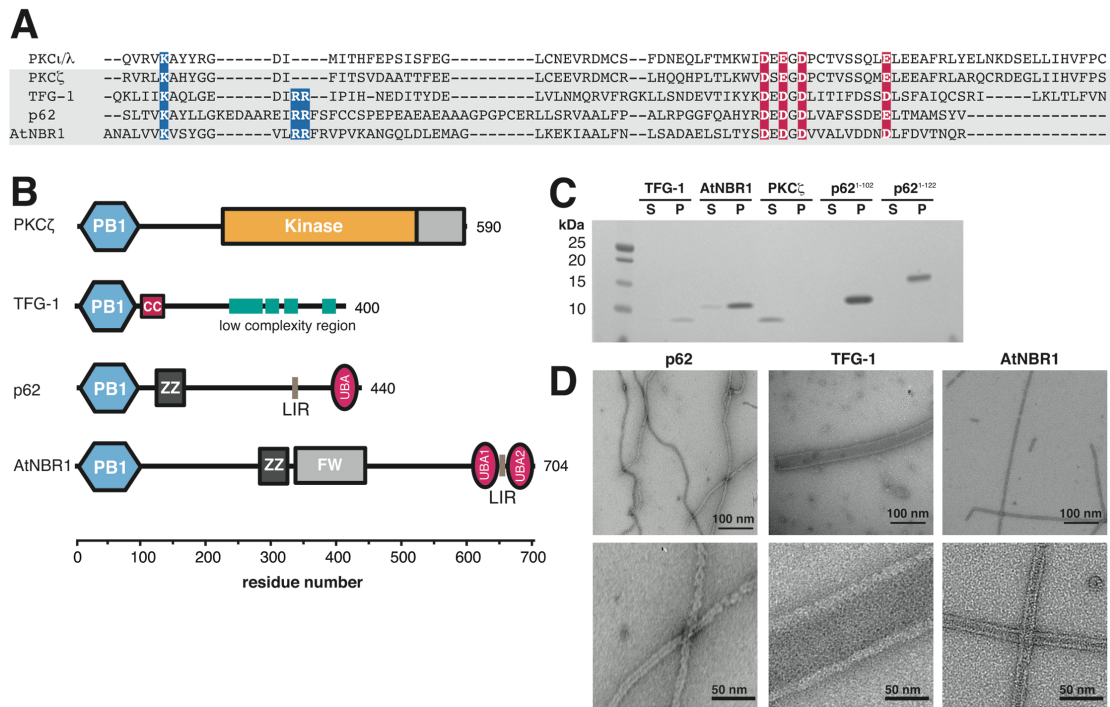

920

921 **Figure 1. Type A/B PB1 domains and their capability to form polymers.**

922 (A) Sequence alignment of the type A/B PB1 domains with highlighted tandem  
 923 arginine motif. (B) Domain architecture of PKCζ, TFG-1, p62, and AtNBR1  
 924 proteins. (C) Pelletation assay of purified type A, B or AB PB1 domains: TFG-  
 925 1, AtNBR1, PKCζ, p62<sup>1-102</sup> and p62<sup>1-122</sup>. Corresponding lanes of soluble (S) and  
 926 pellet (P) fraction are shown. Only PKCζ remains soluble whereas TFG-1,  
 927 AtNBR1 and p62 are found in the pellet. (D) Electron micrographs of negatively  
 928 stained specimens reveal elongated filamentous p62<sup>1-122</sup>, tubular polymers of  
 929 TFG-1 and AtNBR1 of  $145 \pm 5$ ,  $900 \pm 52$  and  $120 \pm 4$  Å nm in diameter,  
 930 respectively.

## Figure 2

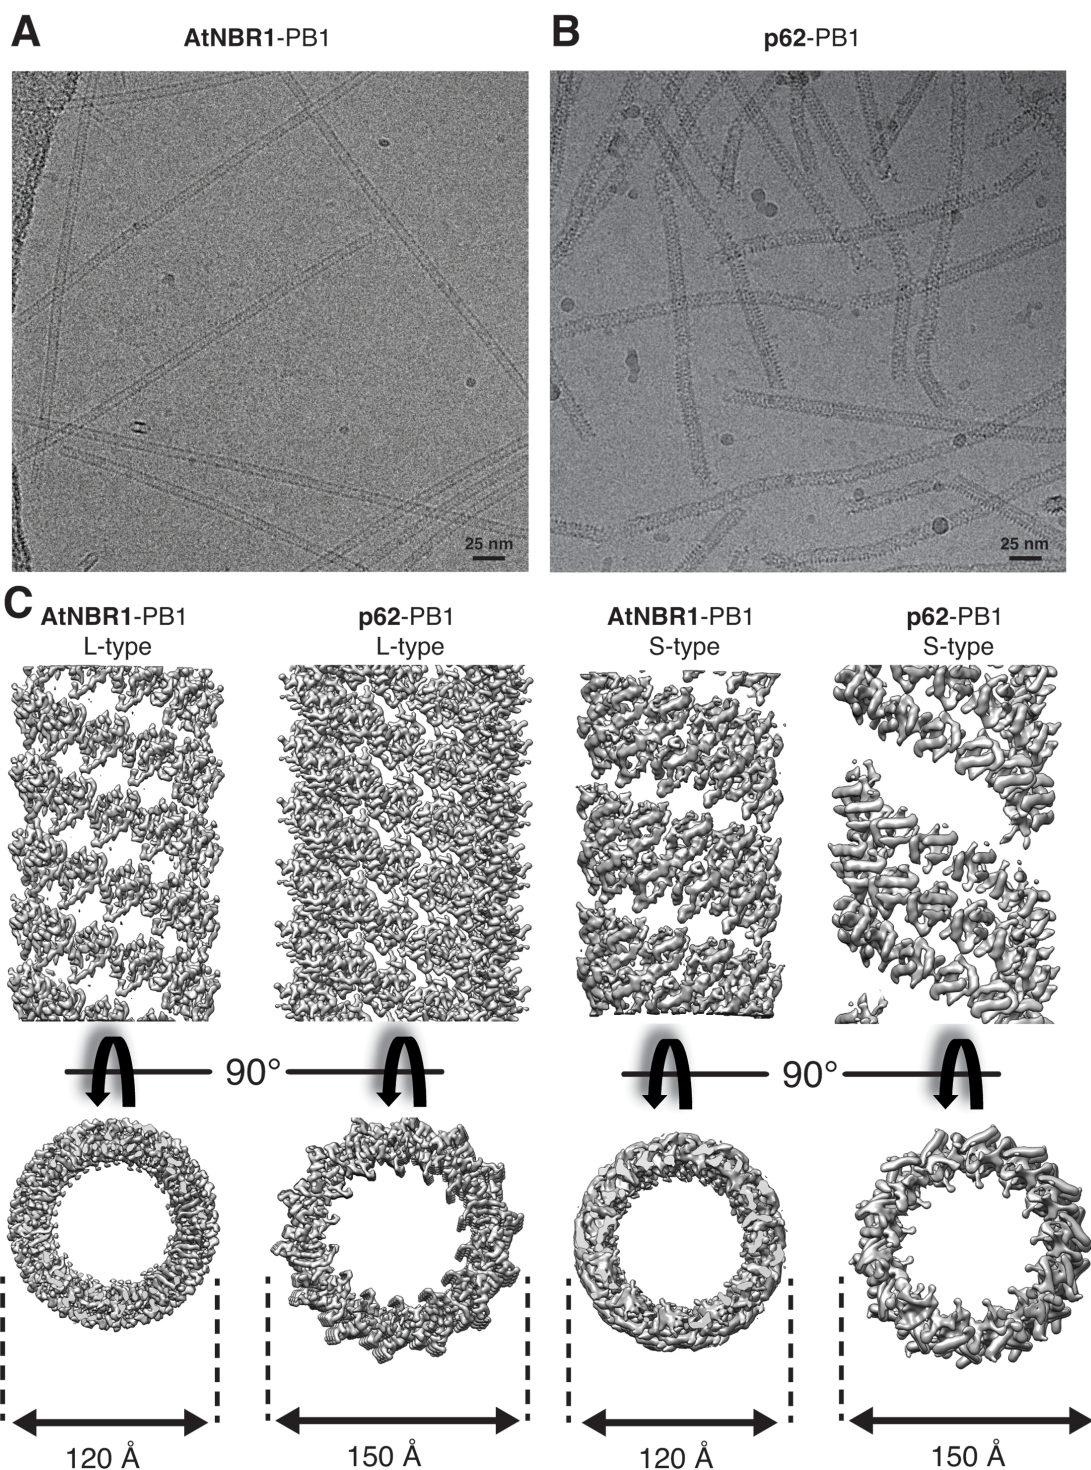

932 **Figure 2. Cryo-EM structures of AtNBR1 and p62<sup>1-122</sup>.**

933 (A) Electron cryo-micrograph of AtNBR1-PB1 and (B) p62-PB1<sup>1-122</sup> assemblies.

934 (C) Side and top views for determined cryo-EM structures of L-type AtNBR1-

935 PB1 (far left), p62-PB1 (left) and S-type assembly of AtNbr-PB1 (right), p62-

936 PB1 (far right).

Figure 3

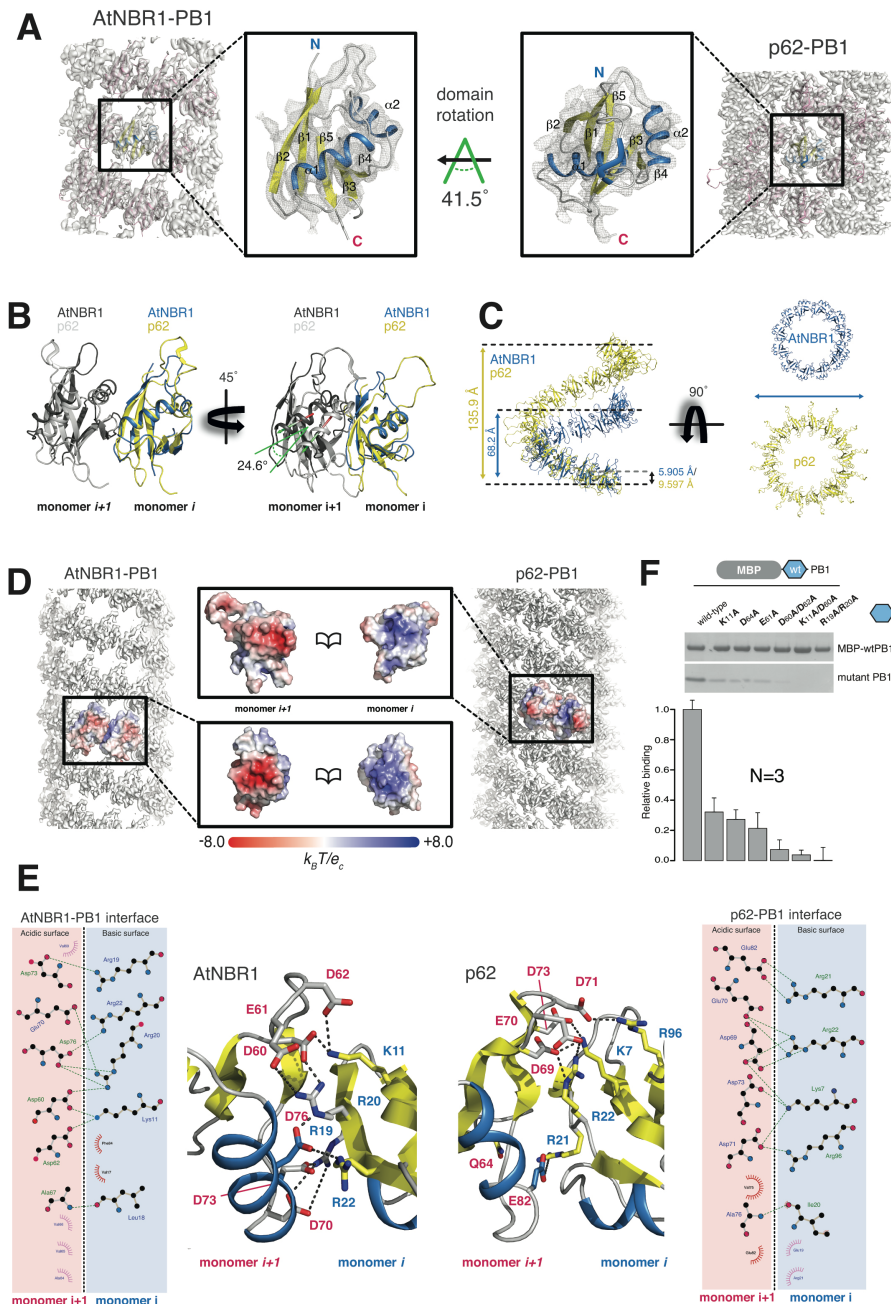

937

938 **Figure 3. Structural basis of PB1 polymer formation.**

939 (A) Cryo-EM density maps of AtNBR1-PB1 (left) and p62-PB1 filaments are  
 940 shown with atomic models superposed on the density. Close-ups show that  
 941 both PB1 domains display the canonical ubiquitin-like fold (center left and  
 942 center right). The arrow indicates the rotation of the p62-PB1 subunit relative to  
 943 the AtNBR1-PB1 subunit in their respective assemblies. (B, C) Differences in  
 944 the PB1-PB1 interface give rise to different helical architectures. (Left)  
 945 Monomer *i* of AtNBR1 (blue) and monomer *i* p62 (yellow) were superposed to



946 visualize the degree of domain rotation towards the next monomer along the  
947 helical rung (monomer  $i+1$ ). (Right) Adjacent subunits along the helical rung for  
948 AtNBR1 display a  $25^\circ$  inward rotation compared with adjacent subunits of p62,  
949 explaining the observed differences in helical symmetry and diameter of  
950 AtNBR1-PB1 and p62-PB1 filaments, respectively (C).  
951 (D) Electrostatic potential surface of the determined AtNBR1-PB1 and p62-PB1  
952 structures. For both structures, the propagation of the helical structure is  
953 mediated and stabilized by positively and negatively charged surfaces on  
954 opposite faces of the PB1 fold. (E) Schematic illustration and detailed  
955 interactions of the PB1-PB1 interface as determined from the AtNBR1-PB1 and  
956 p62-PB1 cryo-EM structures, respectively. The structures are shown in cartoon  
957 representation highlighting key electrostatic residue contacts shown as sticks.  
958 (F) *In vitro* pulldown with maltose-binding protein (MBP)-tagged wild-type  
959 AtNBR1-PB1 of structure-based AtNBR1-PB1 domain mutants.

Figure 4

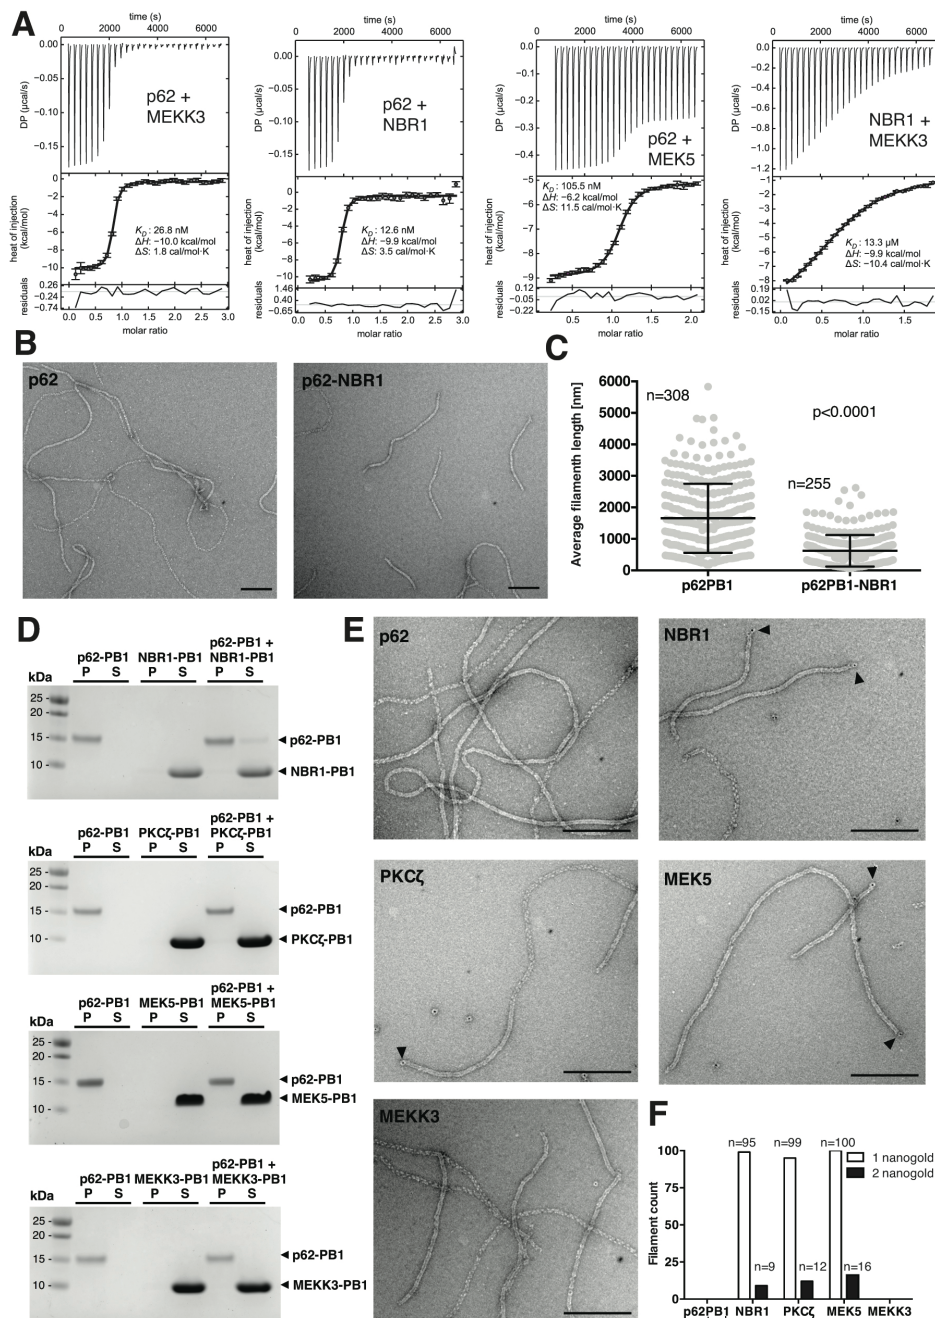

960

961 **Figure 4. Interactions of p62-PB1 with other PB1 domain proteins.**

962 (A) Quantitative determination of PB1 binding affinities by isothermal titration  
 963 calorimetry. Data represent mean and standard deviations from three  
 964 independent experiments. (B) Representative electron micrographs of  
 965 negatively stained p62-PB1<sup>1-122</sup> (left) and p62-PB1<sup>1-122</sup> incubated with human  
 966 NBR1-PB1 (right). (C) Quantification of filament length of P62-PB1<sup>1-122</sup>  
 967 filaments before and after incubation with NBR1-PB1. (D) Co-sedimentation

968 assays of p62-PB1<sup>1-122</sup> with NBR1-PB1, PKC $\zeta$ -PB1, MEK5-PB1 and MEKK3-  
969 PB1 (S = Supernatant; P = Pellet). Control experiments of p62-PB1<sup>1-122</sup> and the  
970 respective PB1 interactor alone are also shown. (E) Representative electron  
971 micrographs of negatively stained p62-PB1<sup>1-122</sup> with nanogold-labeled NBR1-  
972 PB1, PKC $\zeta$ -PB1, MEK5-PB1 or MEKK3-PB1. (F) Quantification of p62-PB1<sup>1-122</sup>  
973 filaments displaying one or two nanogold-labeled PB1 interaction domains.  
974

975

Figure 5

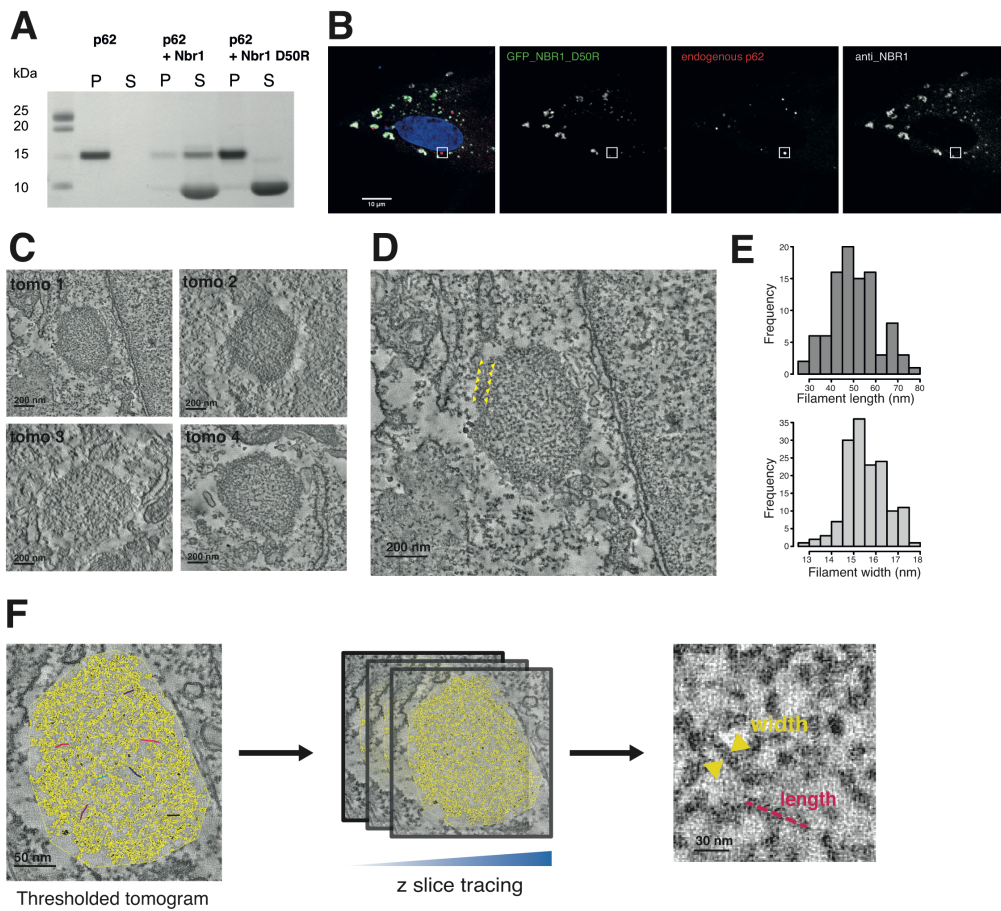

976

977 **Figure 5. CLEM visualization of p62 bodies in cells.**

978 (A) Effect of human NBR1-D50R mutation on p62 filaments. SDS-PAGE  
 979 analysis of pelletation assay showing that p62-PB1 filaments are not disrupted  
 980 by NBR1-PB1 with a D50R mutation (P = pellet; S = supernatant). (B)  
 981 Representative confocal fluorescence images showing p62 and NBR1 in RPE1  
 982 cells. Co-localization analysis of fixed RPE1 cells stably expressing  
 983 NBR1(D50R) shows no overlap of NBR1(D50R) with p62 bodies. (C)  
 984 Representative electron tomogram slices of p62 bodies localized by CLEM. (D)  
 985 Enlarged view of a representative tomogram slice from the highlighted p62  
 986 body in (B) reveals the filament-like meshwork of p62 bodies. Note the apparent  
 987 phase separation of the p62 body from the cytosol. The ring of increased  
 988 density surrounding the bodies is indicated by arrows. (E) Distribution of  
 989 estimated filament length and width from tracing in thresholded tomograms. (F)

990 Schematic illustration of width and length measurements performed in  
 991 thresholded tomograms.

Figure 6

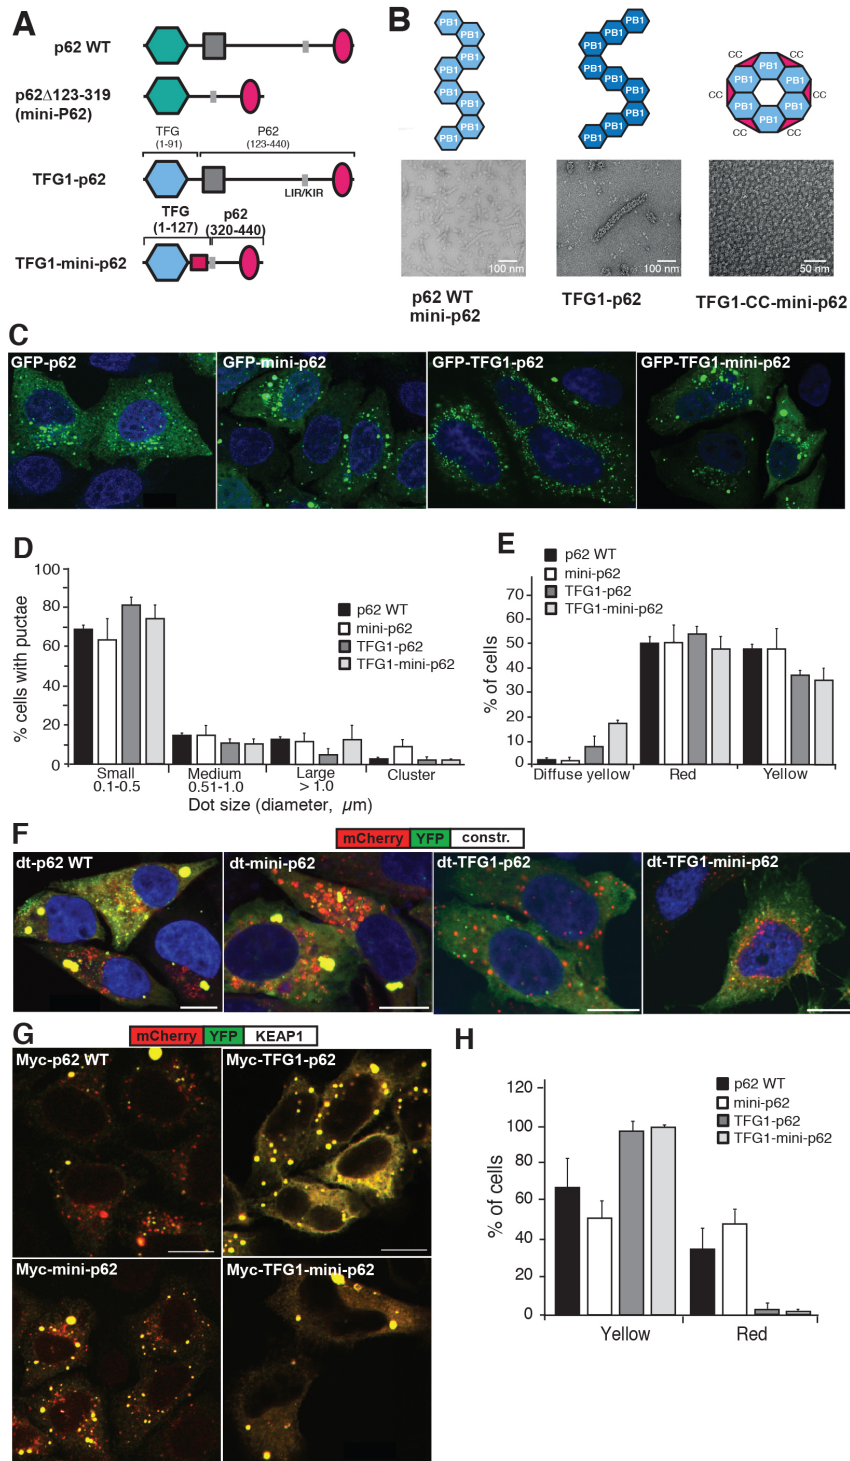

992

993 **Figure 6. Cellular assays of p62 polymeric state.**

994 (A) Schematic illustration of used p62 constructs and chimeras. (B)

995 Representative, negatively stained electron micrographs of purified p62

996 constructs and chimeras from (A) including illustration of polymeric and  
997 oligomeric forms observed by negative staining electron microscopy. (C)  
998 Confocal fluorescent images of HeLa p62 (KO) cells expressing GFP-tagged  
999 constructs and chimeras. All examined constructs form punctate structures. (D)  
1000 Quantification of the number of p62 bodies forming dots of various size. (E)  
1001 Quantification of cells displaying yellow and red dots in (F). (F) Representative  
1002 confocal fluorescence images of HeLa p62 (KO) cells expressing mCherry-  
1003 YFP-tagged (dt-tagged) p62 constructs and chimeras. The appearance of red  
1004 puncta (as an indicator of lysosomal localization) for all constructs indicates that  
1005 all constructs and chimeras can be processed by autophagy. Punctae were  
1006 counted and classified based on more than 100 cells in each condition in three  
1007 independent experiments. (G) Representative confocal fluorescence images of  
1008 HeLa p62 (KO) cells expressing the respective p62 constructs and chimeras,  
1009 as well as mCherry-YFP-tagged KEAP1. (H) Statistics of appearance of  
1010 lysosome-localized and cytosolic dots for mCherry-YFP-tagged KEAP1.  
1011

1012

Figure S1

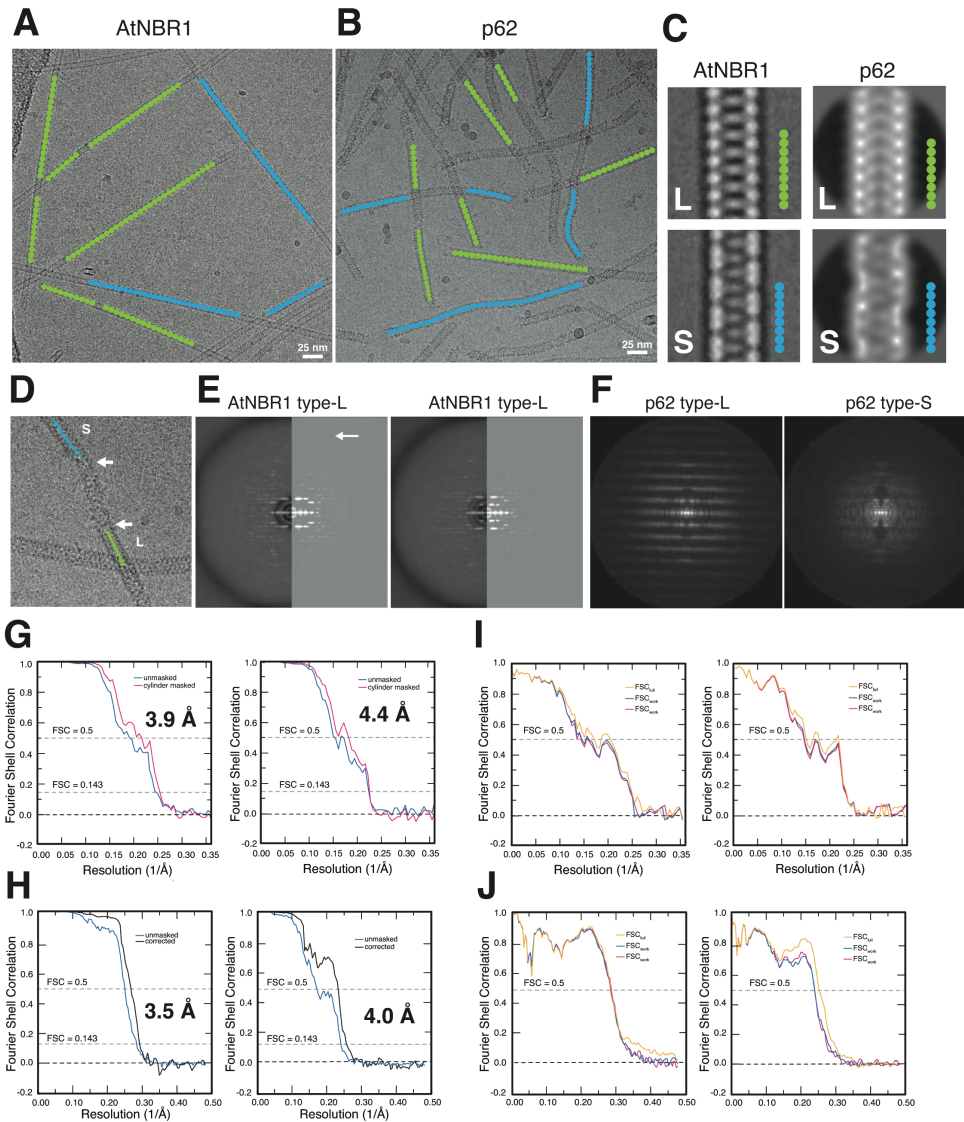

1013

1014 **Figure S1. Electron cryo-microscopy of AtNBR1-PB1 and p62-PB1.**

1015 (A) Representative micrographs of AtNBR1-PB1 with helix traces of segment  
 1016 centers classified as L-type (green) or S-type (blue) superposed. (B)  
 1017 Representative micrographs of p62-PB1 with center traces of segments  
 1018 classified as L-type (green) or S-type (blue) superposed. (C) Low-pass filtered  
 1019 class averages of L-type (top) and S-type (bottom) AtNBR1-PB1 and p62-PB1  
 1020 assemblies. (D) Representative image showing transitions between L and S-  
 1021 type assemblies for p62-PB1 (E) Side-by-side power spectra of L-type (top) and  
 1022 S-type (bottom) AtNBR1-PB1 assemblies with the power of sum of segments  
 1023 (left) and that simulated from re-projection of the 3D structure (right). Arrows

1024 indicate high-resolution meridional layer lines. (F) Power spectra of L-type (top)  
 1025 and S-type (bottom) p62-PB1 assemblies with the summed power spectra of  
 1026 the 2D classes. (G) Fourier shell correlation for 3D reconstruction of L-type (left)  
 1027 and S-type (right) AtNBR1-PB1 assemblies. (H) Fourier shell correlation for 3D  
 1028 reconstruction of L-type (left) and S-type (right) p62-PB1 assemblies. (I) Model  
 1029 vs. map Fourier shell correlation for L-type (left) and S-type (right) AtNBR1-PB1  
 1030 assemblies. (J) Model vs. map Fourier shell correlation for L-type (left) and S-  
 1031 type (right) p62-PB1 assemblies.

Figure S2

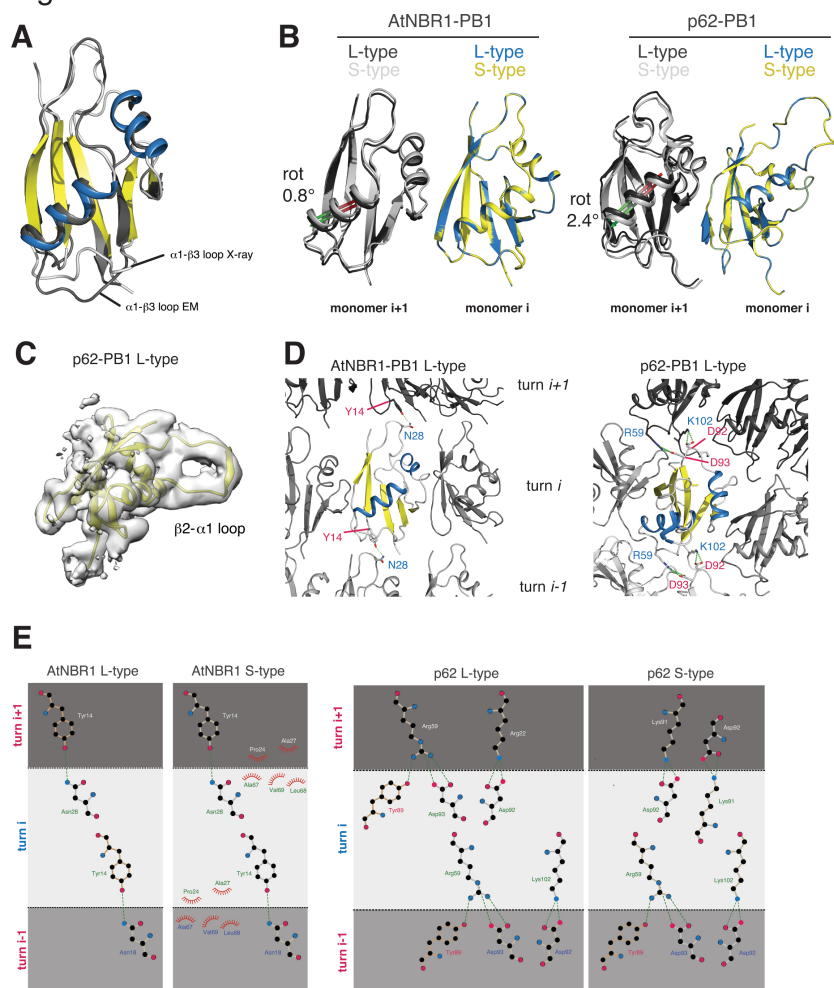

1032

1033 **Figure S2. Atomic models from crystal and cryo-EM structures of**  
 1034 **AtNBR1-PB1<sup>1-95</sup> and p62-PB1<sup>1-122</sup>.**

1035 (A) Superposition of cartoon representation of atomic models from the 1.6 Å  
 1036 crystal structure of AtNBR1-PB1 and the de novo-built model based on the 3.9  
 1037 Å cryo-EM AtNBR1-PB1 density map. Marked differences are observed in loop  
 1038 regions mediating lateral contacts. (B) Superposition of atomic models for L-



1039 type and S-type assemblies for AtNBR1-PB1 (left) and p62-PB1 (right).  
1040 Monomer  $i$  for each assembly is superposed and the difference in rotation of  
1041 adjacent subunit  $i+1$  are indicated. Only minor differences are observed. (C)  
1042 LocScale map for L-type p62-PB1 cropped around one monomer. (D) Lateral  
1043 contacts formed along the helical axis shown for AtNBR1-PB1 (left) and p62-  
1044 PB1 (right). Subunits are shown in cartoon representation and relevant residue  
1045 contacts are highlighted with side-chains shown as stick. (E) Schematic  
1046 representation of common longitudinal contacts formed in AtNBR1-PB1 and  
1047 p62-PB1 helices.

Figure S3

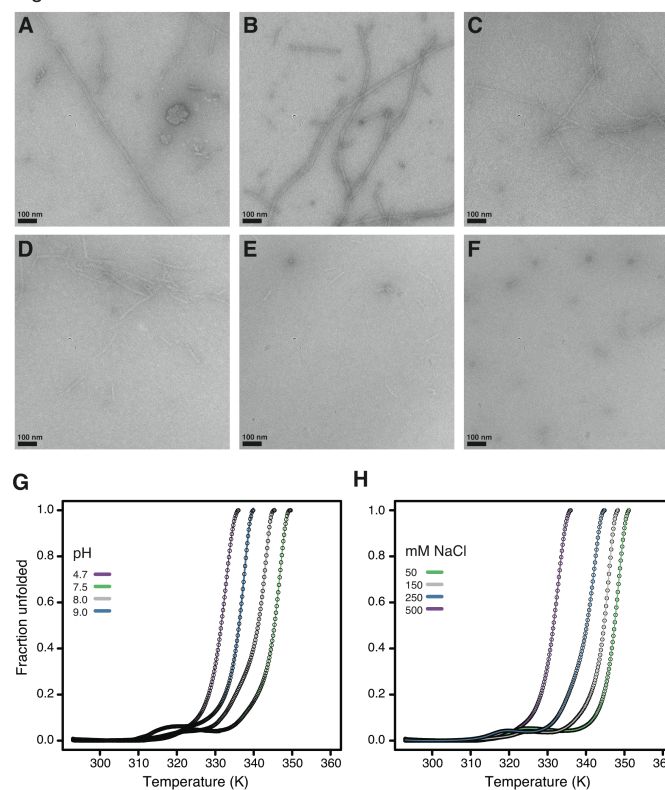

1048

1049 **Figure S3. Electrostatic interactions drive type PB1 filament formation.**

1050 (A-F) Negative-stain electron micrographs of AtNBR1-PB1 at increasing NaCl  
1051 concentrations (A, 0 mM; B, 50 mM; C, 100 mM; D, 150 mM; E, 250 mM; F,  
1052 500 mM) illustrate how ionic strength weakens PB1 homo-oligomerization and  
1053 affects filament length. (G/H) Thermofluor protein unfolding curves demonstrate  
1054 that high ionic strength, as well as low and high pH destabilize a  
1055 thermodynamically favorable (filamentous) state of AtNBR1-PB1.

## Figure S4

**A**

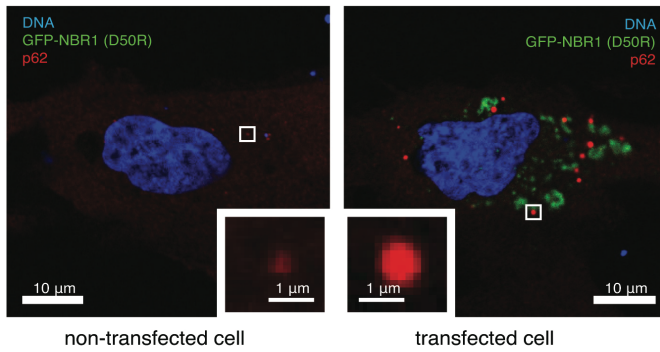

**B**

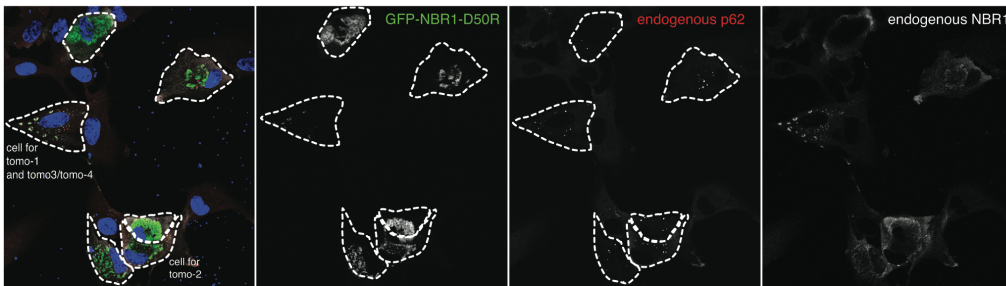

**C**

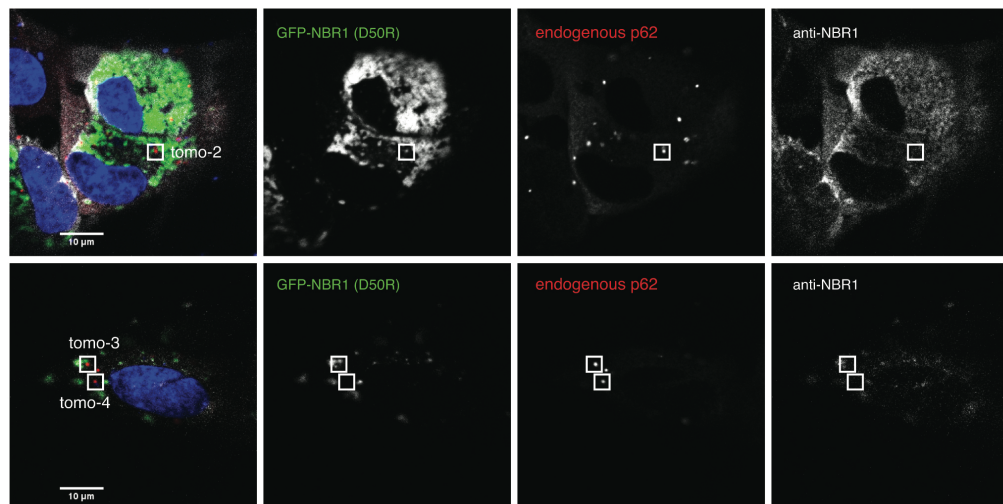

1056

1057 **Figure S4. Fluorescence images of RPE1 cells.**

1058 (A) Representative confocal fluorescence image of RPE1 cells expressing or  
1059 not expressing NBR1(D50R). Note the difference in average dot size of  
1060 mCherry-p62 observed for both cases. (B) Overview fluorescence image  
1061 showing the cells used for tomogram acquisition. Cells are outlined and the  
1062 tomogram number is indicated. (C) Close-up view of cells in (B) indicating the  
1063 subcellular position for tomogram acquisition.

Figure S5

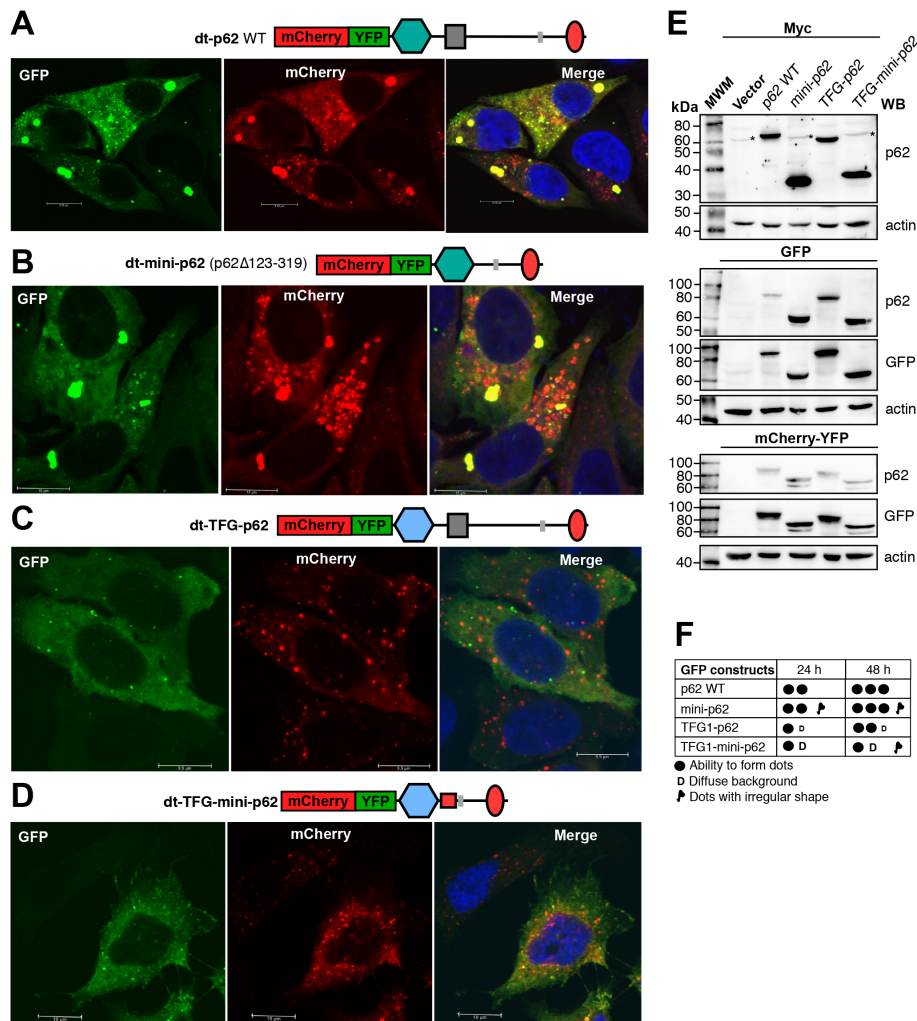

1064

1065 **Figure S5. Chimera variants of p62 with the PB1 domain exchanged with**  
 1066 **a related domain from TFG is efficiently degraded by autophagy.**

1067 (A-D) Representative confocal images of HeLa p62 KO cells transiently  
 1068 transfected with the indicated p62 constructs fused to the mCherry-YFP double  
 1069 tag. Efficient degradation by autophagy is indicated by the accumulation of red-  
 1070 only dots. (E) Representative western blots using extracts from HeLa cells  
 1071 transiently transfected with the indicated p62 constructs fused to Myc (top),  
 1072 GFP (middle) or mCherry-YFP (bottom). p62, GFP or actin antibodies were  
 1073 used as indicated. (F) Graphic presentation of phenotypes observed by  
 1074 confocal imaging of cells transfected with p62 constructs fused to GFP (number  
 1075 of dots, morphology of dots, and amount of diffuse protein). Cells were analyzed  
 1076 24h and 48h after transfection.

Figure S6

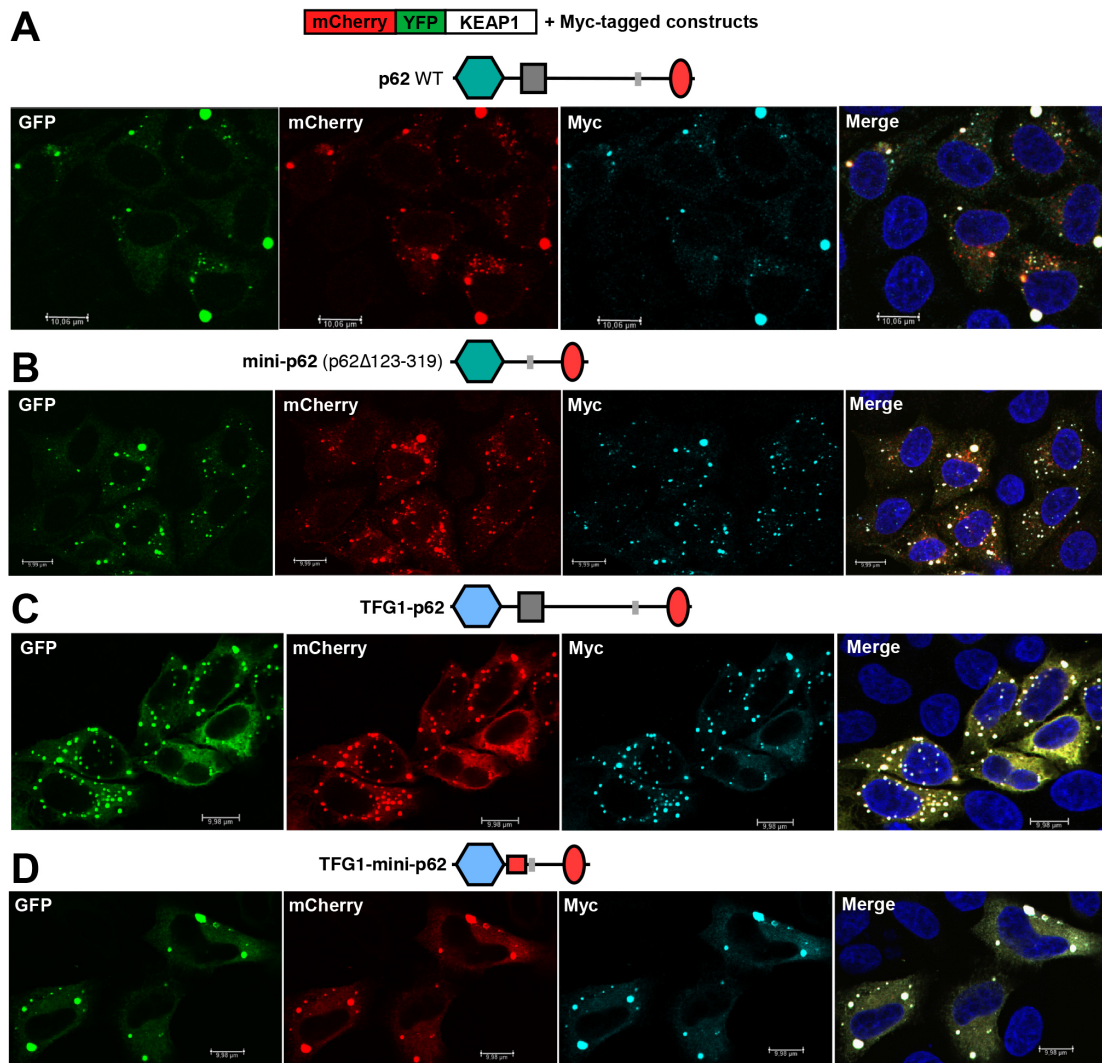

1077

1078 **Figure S6. p62-mediated degradation of co-expressed KEAP1 depends on**  
1079 **the native PB1 domain of p62.**

1080 (A-D) Representative confocal images of HeLa p62 KO cells transiently co-  
1081 transfected with mCherry-YFP tagged KEAP1 and the indicated p62 constructs  
1082 fused to Myc. Degradation of KEAP1 by autophagy (accumulation of red-only  
1083 dots) is seen in cells co-transfected with full-length p62 or a mini-p62 deleted  
1084 for residues 123-319, but not in cells co-transfected with chimera constructs  
1085 containing the PB1 domain of TFG1.

1086

1087

1088

1089 **Table S1. X-ray crystallography data collection and refinement statistics.**

| <b>Data collection statistics</b> |                            |
|-----------------------------------|----------------------------|
| Wavelength                        |                            |
| Resolution range                  | 37.9 – 1.53 (1.585 - 1.53) |
| Space group                       | P 21 21 2                  |
| Unit cell                         | 43.13 79.44 24.14 90 90 90 |
| Total reflections                 | 25830 (2499)               |
| Unique reflections                | 13035 (1271)               |
| Multiplicity                      | 2.0 (2.0)                  |
| Completeness (%)                  | 99.22 (99.30)              |
| Mean I/sigma(I)                   | 10.45 (1.42)               |
| Wilson B-factor                   | 20.99                      |
| R-merge                           | 0.02799 (0.4132)           |
| R-meas                            | 0.03958 (0.5844)           |
| R-pim                             | 0.02799 (0.4132)           |
| CC1/2                             | 0.999 (0.655)              |
| CC*                               | 1.00 (0.89)                |
| <b>Model refinement</b>           |                            |
| Reflections used in refinement    | 13030 (1271)               |
| Reflections used for R-free       | 669 (53)                   |
| R-work                            | 0.2199 (0.3688)            |
| R-free                            | 0.2492 (0.4036)            |
| CC(work)                          | 0.943 (0.724)              |
| CC(free)                          | 0.937 (0.592)              |
| <b>Model refinement</b>           |                            |
| Number of non-hydrogen atoms      | 822                        |
| macromolecules                    | 723                        |
| ligands                           | 64                         |
| solvent                           | 35                         |
| Protein residues                  | 88                         |
| RMS (bonds)                       | 0.007                      |
| RMS (angles)                      | 0.79                       |
| Ramachandran                      |                            |
| favored (%)                       | 100.00                     |
| allowed (%)                       | 0.00                       |
| outliers (%)                      | 0.00                       |
| Rotamer outliers (%)              | 2.60                       |
| Clashscore                        | 3.47                       |
| Average B-factor                  | 33.46                      |
| macromolecules                    | 31.66                      |
| ligands                           | 48.45                      |
| solvent                           | 43.43                      |

1090 \*Statistics for the highest-resolution shell are shown in parentheses.

1091 **Table S2. Cryo-EM data collection and model refinement statistics.**

|                                       | <b>AtNBR1-PB1<sup>1-95</sup></b><br>(EMD-XXXX, EMD-YYYY) | <b>p62-PB1<sup>1-122</sup></b><br>(EMD-XXXX, EMD-YYYY) |
|---------------------------------------|----------------------------------------------------------|--------------------------------------------------------|
| <b>Data collection and processing</b> |                                                          |                                                        |
| Magnification                         | 105kx                                                    | 130kx                                                  |
| Voltage (kV)                          | 300                                                      | 300                                                    |
| Electron exposure (e-/Å)              | 17                                                       | 40                                                     |
| Defocus range (um)                    | 1.0-4.0                                                  | 0.5-2.5                                                |
| Pixel size (Å)                        | 1.386                                                    | 1.040                                                  |
| Symmetry imposed                      | S-type: C1<br>L-type: C2                                 | S-type: C1<br>L-type: C2                               |
| Final no. particle images             | S-type: 18,021<br>L-type: 25,387                         | S-type: 51,679<br>L-type: 51,853                       |
| Helical rise (Å)                      | S-type: 5.905<br>L-type: 6.721                           | S-type: 9.78<br>L-type: 4.787 (9.574)*                 |
| Helical twist (°)                     | S-type: -31.17<br>L-type: -31.44                         | S-type: -26.48<br>L-type: 77.29 (-25.42)*              |
| Global map resolution (Å, FSC=0.143)  | S-type: 4.4<br>L-type: 3.9                               | S-type: 4.0<br>L-type: 3.5                             |
| Local map resolution range (Å)        | S-type: 4.0 – 4.7<br>L-type: 3.4 – 4.1                   | S-type: 3.7 – 4.4<br>L-type: 3.3 – 4.4                 |

1092 \* equivalent notation for asymmetric unit of two monomers as described in the main text

|                                           | <b>AtNBR1-PB1<sup>1-95</sup></b><br>(PDBXXX, PDBYYY) | <b>p62-PB1<sup>1-122</sup></b><br>(PDBXXX, PDBYYY) |
|-------------------------------------------|------------------------------------------------------|----------------------------------------------------|
| <b>Model refinement</b>                   |                                                      |                                                    |
| Initial model used (PDB code)             | PDB-XYZ (X-ray model)                                | PDB ID 2kkc#                                       |
| Model resolution (Å, FSC=0.5)             | S-type: 5.5<br>L-type: 4.3                           | S-type: 4.0<br>L-type: 3.6                         |
| Map sharpening B-factor (Å <sup>2</sup> ) | S-type: -300<br>L-type: -200                         | S-type: -193<br>L-type: -139                       |
| <b>Model composition</b>                  |                                                      |                                                    |
| Non-hydrogen atoms                        | 669 (S-/L-type)                                      | 808 (S-/L-type)                                    |
| Protein residues                          | 88 (S-/L-type)                                       | 104 (S-/L-type)                                    |
| <b>R.m.s. deviations</b>                  |                                                      |                                                    |
| Bond lengths (Å)                          | 0.009/0.008 (S-/L-type)                              | 0.006/0.007 (S-/L-type)                            |
| Bond angles (°)                           | 1.16/1.161 (S-/L-type)                               | 1.22/1.24 (S-/L-type)                              |
| <b>Validation</b>                         |                                                      |                                                    |
| MolProbity score                          | 2.41/2.29 (S-/L-type)                                | 1.94/1.64 (S-/L-type)                              |
| Clashscore*                               | 7.59/6.41 (S-/L-type)                                | 4.89/1.88/ (S-/L-type)                             |
| Rotamer outliers (%)                      | 1.41/1.41 (S-/L-type)                                | 0.00/0.63 (S-/L-type)                              |
| <b>Ramachandran plot</b>                  |                                                      |                                                    |
| Favored (%)                               | 93.21/94.19 (S-/L-type)                              | 83.33/83.33 (S-/L-type)                            |
| Allowed (%)                               | 6.79/5.81 (S-/L-type)                                | 16.67/16.67 (S-/L-type)                            |
| Disallowed (%)                            | 0.00 (S-/L-type)                                     | 0.00 (S-/L-type)                                   |

1093 \* computed for 9-mer

1094 # Saio, T., Yokochi, M., and Inagaki, F. (2009). The NMR structure of the p62 PB1 domain, a key protein in  
1095 autophagy and NF-kappaB signaling pathway. *J Biomol NMR* 45, 335–341.  
1096
